# Supplementary material for: Joint retrieval of surface reflectance and aerosol properties with continuous variation of the state variables in the solution space: Part 2: Application to geostationary and polar orbiting satellite observations
Source: Copernicus journal article supplement (doi:10.5194/amt-2018-265), 2018-08-10
Supplement: Supplementary file 1 [file amt-2018-265-supplement.pdf]

## S1 BHR evaluation against MODIS data

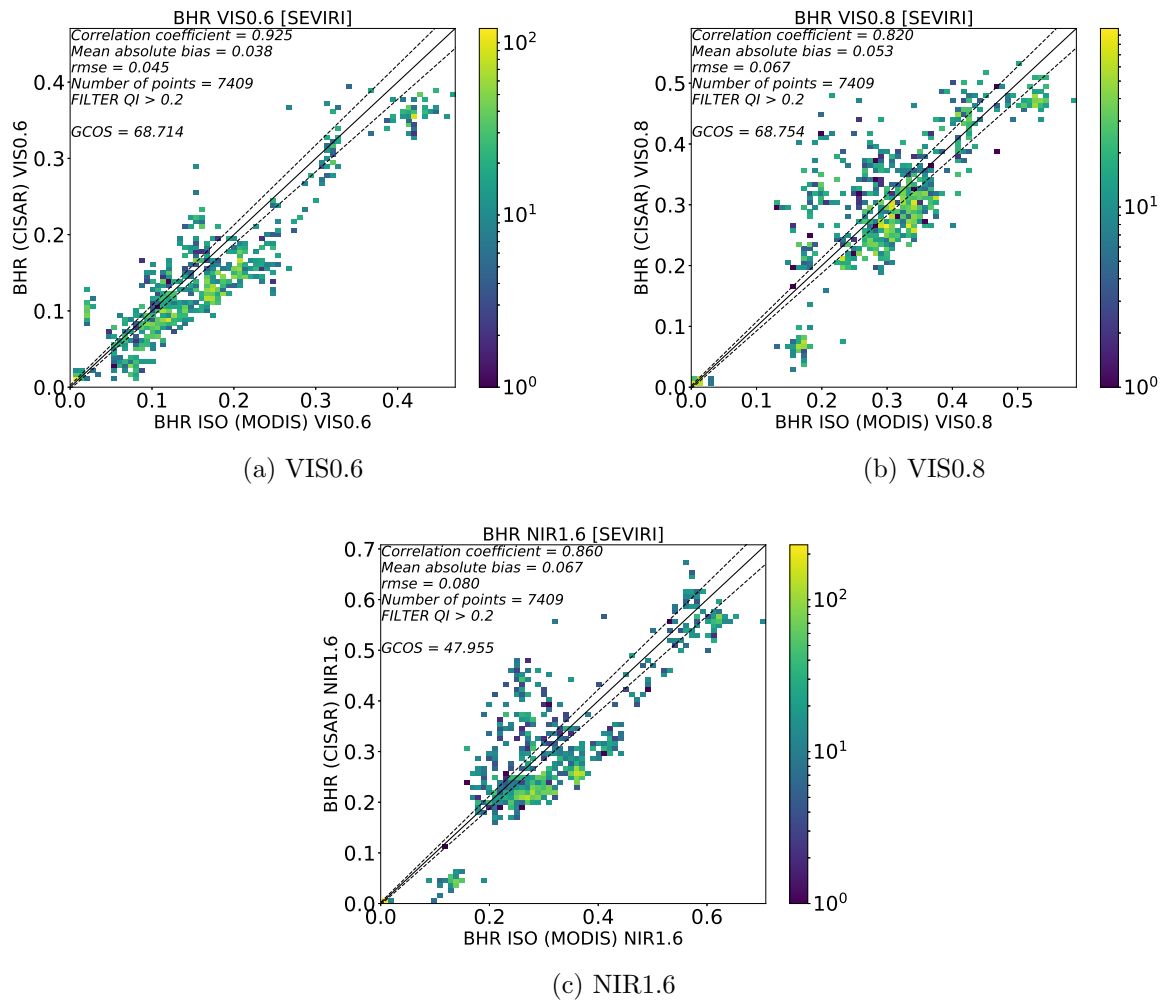

Figure S1 – Density plots of CISAR BHR retrieval from SEVIRI observations compared with MODIS data

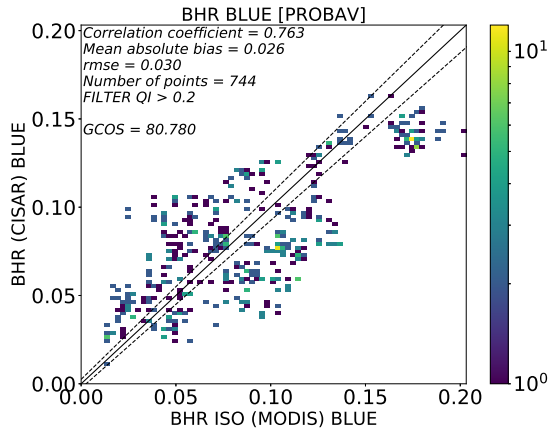

(a) BLUE

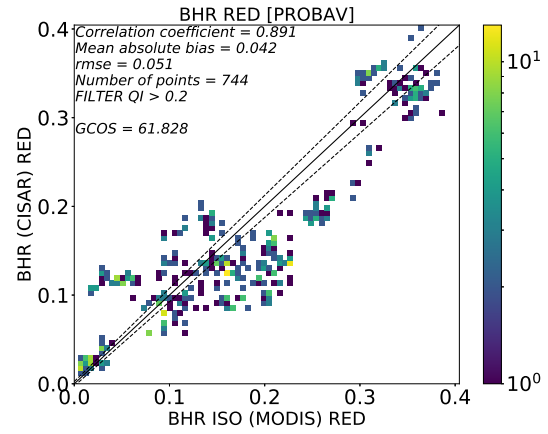

(b) RED

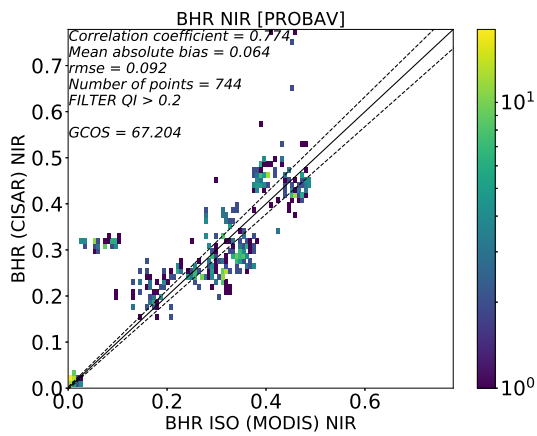

(c) NIR

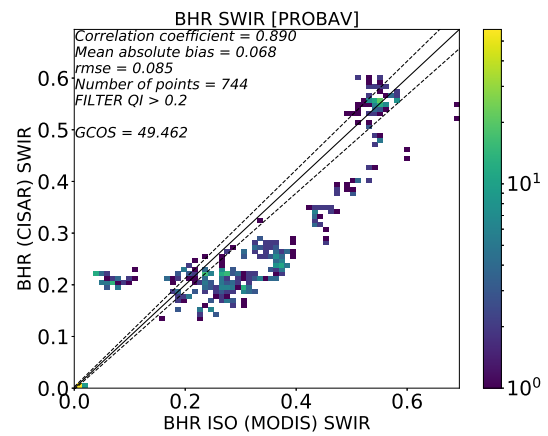

(d) SWIR

Figure S2 – Same as S1 but for CISAR retrieval from PROBA-V observations.

## S2 CISAR performances in detecting aerosol events

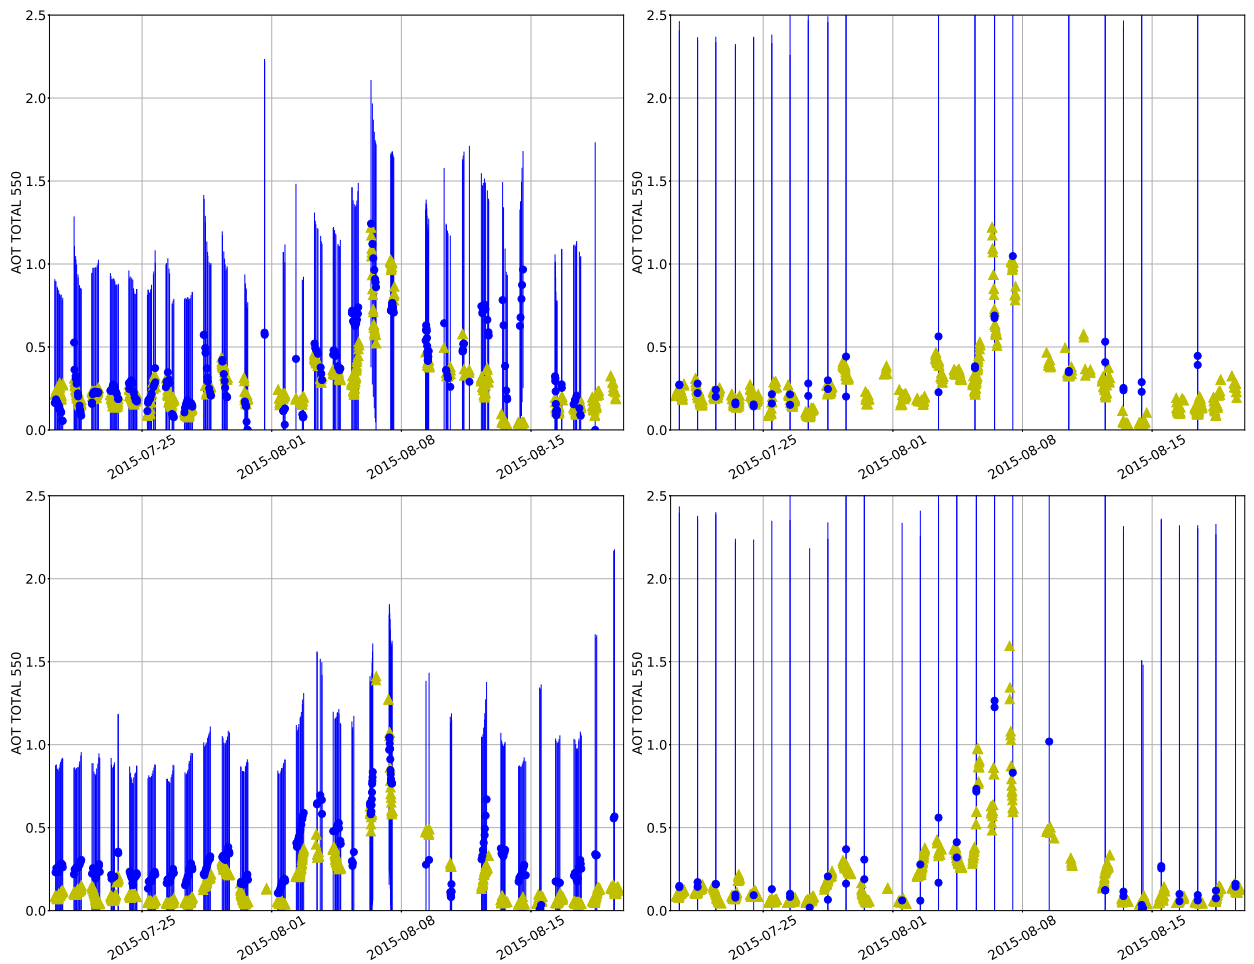

Figure S3 – High AOT event over Murcia (upper panel) and Granada (bottom panel), Spain, over summer 2015. The yellow triangles represent AERONET observations, the blue dots represent CISAR retrieval from SEVIRI (left panel) and PROBA-V (right panel) observations respectively.

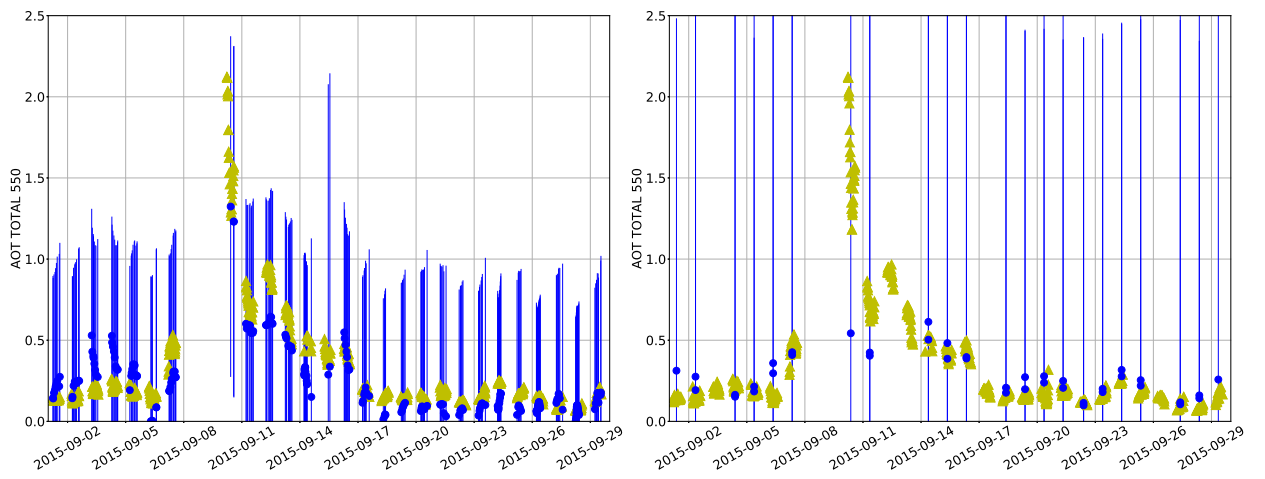

Figure S4 – Same as Fig. S3 but over Sede Boker, Israel, over September 2015.
