# Supplementary material for: Joint retrieval of surface reflectance and aerosol properties with continuous variation of the state variables in the solution space: Part 2: Application to geostationary and polar orbiting satellite observations
Source: Copernicus journal article supplement (doi:10.5194/amt-2018-265), 2018-08-10
Supplement: Supplementary file [file amt-2018-265-AC2-supplement.pdf]

# Joint retrieval of surface reflectance and aerosol properties with continuous variation of the state variables in the solution space: Part 2: Application to geostationary and polar-orbiting satellite observations

Marta Luffarelli<sup>1</sup> and Yves Govaerts<sup>1</sup>

<sup>1</sup>Rayference, Brussels, Belgium

*Correspondence to:* Marta Luffarelli (marta.luffarelli@rayference.eu)

**Abstract.** This paper presents the simultaneous retrieval of Aerosol Optical Thickness and surface properties from the CISAR algorithm applied both to geostationary and polar orbiting satellite observations. The theoretical concepts of the CISAR algorithm have been described in Govaerts and Luffarelli (2017). CISAR has been applied to SEVIRI and PROBA-V observations acquired over 5 20 AERONET stations during year 2015. The CISAR retrieval from the two sets of observations is evaluated against independent datasets such as MODIS land product and AERONET data. The performance differences resulting from the two types of orbit are discussed, analysing and comparing the information content of SEVIRI and PROBA-V observations.

## 1 Introduction

10 Aerosol property retrieval over land surfaces from space observation is a challenging problem due to the strong radiative coupling between atmospheric and surface radiative processes. Different approaches are usually exploited to retrieve different Earth system components (*e.g.*, Hsu et al. (2013), Mei et al. (2017)), leading to inconsistent and less accurate datasets. The joint retrieval of surface reflectance and aerosol properties, as originally proposed by Pinty et al. (2000), presents 15 many advantages, such as the possibility to perform the retrieval over any type of surface and assure the radiative consistency among the retrieved variables.

Govaerts and Luffarelli (2017) (hereafter referred to as Part I) describes the theoretical aspects of the Combined Inversion of Surface and AeRosols (CISAR) algorithm, designed for the joint retrieval of surface reflectance and aerosol properties. This new generic retrieval method specifically 20 addresses issues related to the continuous variation of the state variables in the solution space within

an Optimal Estimation (OE) framework. Through a set of experiments, the capability of CISAR of retrieving surface reflectance and aerosol properties within the solution space was illustrated. Nonetheless, these experiments only represent ideal simulated observation conditions, *i.e.*, noise free data acquired in narrow spectral bands placed in the principal plane assuming unbiased surface prior information. This second part aims to demonstrate CISAR's applicability to actual satellite observations, with less favourable geometrical conditions than the principal plane and accounting for the radiometric noise. For this purpose, the algorithm has been applied to two radiometers with similar spectral properties but different orbits (geostationary and polar). Radiometers on board of geostationary platforms deliver observations with a revisit time of tens of minutes but with a limited field of view so that many instruments are needed to cover the entire Earth. The poles cannot be observed. Conversely, a polar orbit, combined with an adequate swath, could offer a daily revisit time of the entire globe. The selected radiometers are the Spinning Enhanced Visible and Infrared Imager (SEVIRI), flying on board of the Meteosat Second Generation (MSG) geostationary platform, and the PRoject for On-Board Autonomy - Vegetation (PROBA-V). These two instruments have similar radiometric performances and both have acquired more than 15 years of observations thanks to the launch of a succession of radiometers with very similar characteristics. Applying the same algorithm on similar instruments flying in different orbits represents a meaningful way to analyse the CISAR generic algorithm performance.

This paper is organised as follows. Section 2 describes the observation system considered in the OE framework: the satellite observation, the ancillary information, the prior information and the forward model. The uncertainty characterisation of the observation system is also described in Sect. 2. The algorithm implementation is described in Sect. 3. Section 4 analyses the information content of the satellite observations, comparing the differences between the geostationary and polar orbiting instruments, and discusses the challenges encountered when little or no information about the retrieved variables is carried by the observation. Given these difficulties in the retrieval, a Quality Indicator (QI) is implemented and presented in Sect. 5, characterising the reliability of the solution. Finally, the performance of CISAR is discussed in detail in Sect. 6. The CISAR retrieved Aerosol Optical Thickness (AOT) and Bidirectional Hemispherical Reflectance (BHR) will be compared against those derived from the Aerosol Robotic Network (AERONET) (Giles et al., 2017) and the Moderate Resolution Imaging Spectroradiometer (MODIS) Land product data (DAAC, 2017), respectively. The performance differences between the retrieved datasets obtained from SEVIRI and PROBA-V observations will be further investigated through statistics on the quality of the retrieval and through the information content of the satellite observations.

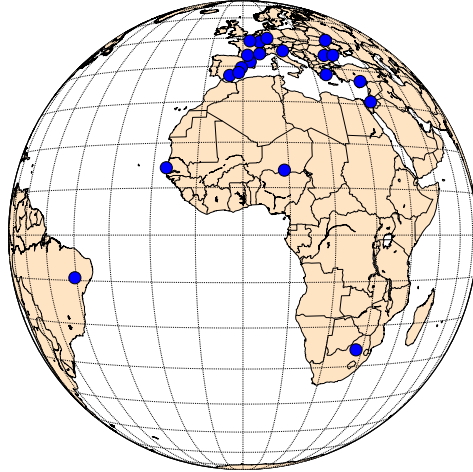

Fig. 1: Selected AERONET stations location. All stations are located within the SEVIRI field of view.

## 2 Observation system characterisation

### 55 2.1 Observation system definition

The fundamental principle of the OE is to maximise the probability  $P = P(\mathbf{x}|\mathbf{y}_{\Omega\bar{\lambda}}, \mathbf{x}_b, \mathbf{b})$  with respect to the values of the state vector  $\mathbf{x}$ , conditional to the value of the measurements and any prior information (Rodgers, 2000). The ensemble of measurements, prior information, ancillary data and the forward model constitutes the observation system. This section describes each component of this system for the two satellite datasets processed in the framework of this study.

In order to evaluate the CISAR algorithm performance when applied to observations acquired from different orbits, 20 AERONET stations located within the SEVIRI field of view have been selected (Fig. 1, Table 1). These targets span different geometries and land cover types (vegetation, urban, bare areas, water, mixed). The observations pertain year 2015.

For each of these stations, satellite data have been acquired, together with ancillary information, such as the cloud mask and the model parameters, which are all the parameters that are not retrieved by the algorithm but that influence the observation. Satellite data and ancillary information are accumulated in time to form a multi-angular observation vector  $\mathbf{y}_{\Omega\bar{\lambda}}$ , in order to correctly characterise the surface reflectance anisotropy. Nevertheless, retrieving surface and aerosol properties from satellite observations is an ill posed problem (Wang, 2012). Consequently, assumptions on the magnitude and on the temporal/spectral variability of the state variables are made. The ensemble of these assumptions and their associated uncertainties constitutes the prior information.

Table 1: AERONET targets

| Name               | Latitude | Longitude | Land Cover Type |
|--------------------|----------|-----------|-----------------|
| Athens_NOA         | 37.99    | 23.77     | Urban           |
| Barcelona          | 41.39    | 2.12      | Urban           |
| Bucharest_Inoe     | 44.35    | 26.03     | Mixed           |
| Bure_OPE           | 48.56    | 5.50      | Vegetation      |
| Burjassot          | 39.51    | -0.42     | Urban           |
| Carpentras         | 44.08    | 5.06      | Vegetation      |
| Dakar              | 14.39    | -16.96    | Costal          |
| Gloria             | 44.60    | 29.36     | Water           |
| Granada            | 37.16    | -3.60     | Urban           |
| IMS-METU-ERDERMLI  | 36.56    | 34.25     | Costal          |
| Kyiv               | 50.36    | 30.50     | Vegetation      |
| Mainz              | 49.50    | 8.30      | Mixed           |
| Murcia             | 38.01    | -1.17     | Vegetation      |
| Paris              | 48.87    | 2.33      | Urban           |
| Petrolina_SONDA    | -9.38    | -40.50    | Urban           |
| Pretoria_CSIR-DPSS | -25.76   | 28.28     | Mixed           |
| Sede_Boker         | 30.85    | 34.78     | Bare Areas      |
| Toulouse_MF        | 43.57    | 1.37      | Urban           |
| Venise             | 45.31    | 12.51     | Water           |
| Zinder_Airport     | 13.78    | 8.99      | Bare Areas      |

The observation uncertainty  $\sigma_o$  characterisation is one of the most critical aspect of the CISAR algorithm as it directly determines the likelihood of the solution. In fact,  $\sigma_o$  determines the observation term of the cost function (Eq. 17 of Part I). The observation uncertainty is composed of the radiometric uncertainty, directly related to the radiometer characteristics, the forward model uncertainty and the uncertainty related to the model parameters.

## 2.2 Satellite data

MSG nominal position is  $0^\circ$  over the equator in a geostationary orbit. SEVIRI is the main instrument of the MSG mission, which has as primary objective the observation in the near real-time of the Earth's full disk, shown in Fig. 1. SEVIRI achieves this with 12 channels, ranging from  $0.6 \mu\text{m}$  to  $13 \mu\text{m}$ , three of which are located in the solar spectrum and centred at  $0.64 \mu\text{m}$ ,  $0.81 \mu\text{m}$  and  $1.64 \mu\text{m}$  and are used within this study. SEVIRI observes the Earth's full disk with a 15 minute repeat cycle. The sampling distance between two adjacent pixels at the sub-satellite point is 3 km for the visible bands. As there is no on-board device for the calibration of the solar channels, the calibration within this study has been performed with the method proposed by Govaerts et al. (2013).

PROBA-V satellite mission is intended to ensure the continuation of Satellite Pour l'Observation de la Terre 5 (SPOT5) VEGETATION products since May 2014 (Sterckx et al., 2014). The mi-

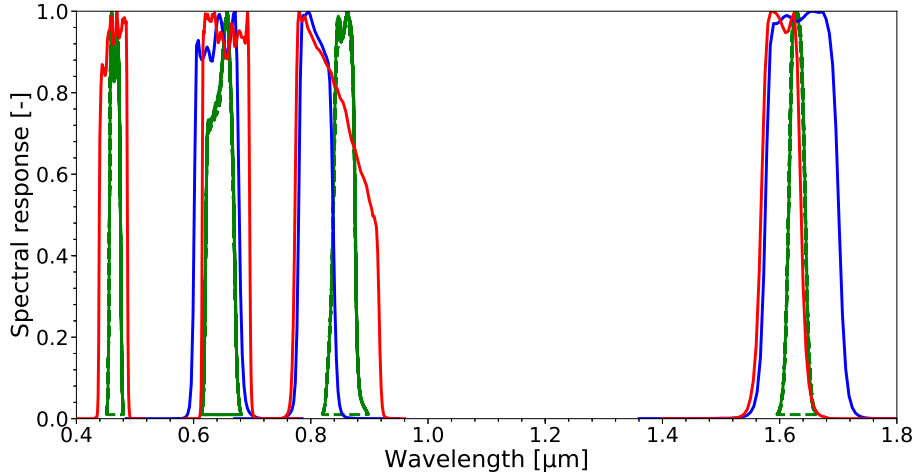

Fig. 2: SEVIRI (in blue), PROBA-V (in red) and MODIS (in green) spectral responses.

crosatellite offers global coverage of land surface with daily revisit for latitude from  $75^{\circ}\text{N}$  to  $56^{\circ}\text{S}$   
 90 in four spectral bands, centred at  $0.46\ \mu\text{m}$ ,  $0.66\ \mu\text{m}$ ,  $0.83\ \mu\text{m}$  and  $1.61\ \mu\text{m}$ . PROBA-V products are  
 provided at a spatial resolution of  $1/3\ \text{km}$  and  $1\ \text{km}$ , the latter being used in the framework of this  
 study. To cover the wide angular field of view ( $101^{\circ}$ ) in a small-sized platform, the optical design of  
 PROBA-V is made up of three cameras (identical three-mirror anastigmatic telescopes). The three  
 cameras have an equal field of view. The down-pointing central camera covers a swath  $500\ \text{km}$   
 95 wide, while the swath of the right and left cameras is  $875\ \text{km}$  wide. Although the three cameras  
 have different responses, a mean Spectral Response Functions (SRF) is considered within this study,  
 accounting for the radiometric uncertainty associated with this approximation. Each camera has two  
 focal planes, one for the short wave infrared (SWIR) band and one for the visible and near-infrared  
 (VNIR) bands. Despite the different viewing angles in the SWIR band, CISAR assumes the obser-  
 100 vations are acquired with the same geometry in all bands. This assumption leads to an additional  
 term in the observation uncertainty. Because of the omission of on-board calibration devices, the  
 PROBA-V in-flight calibration relies only on vicarious methods (Sterckx et al., 2013).

The similarities between the three SEVIRI solar bands and the red, NIR and SWIR PROBA-V  
 bands permit the evaluation and comparison of the CISAR performances when applied to the two  
 105 instruments, whose spectral responses are shown in Fig. 2. The satellite observations have been ac-  
 quired from the European Organisation for the Exploitation of Meteorological Satellites (EUMET-  
 SAT) Earth Observation Portal and from the Flemish Institute for Technological Research (VITO)  
 for SEVIRI and PROBA-V respectively. The Top Of Atmosphere (TOA) Bidirectional Reflectance  
 Factor (BRF) is computed directly from the digital count value in case of SEVIRI, whereas for  
 110 PROBA-V the Level 2-A TOA BRF is provided by VITO (Wolters et al., 2018). The satellite obser-  
 vation uncertainty is derived from the radiometric noise  $\sigma_i$  and the geolocation uncertainty  $\sigma_r$ . For

Table 2: PROBA-V instrument noise [%]

| <b>Band</b> | Left camera | Center Camera | Right Camera |
|-------------|-------------|---------------|--------------|
| BLUE        | 4           | 4             | 4            |
| RED         | 3           | 3             | 3            |
| NIR         | 3           | 3             | 3            |
| SWIR        | 5           | 4             | 5            |

PROBA-V two additional terms are calculated: the uncertainty  $\sigma_c$  associated to the approximation of a mean SRF of the cameras and the one deriving from considering the same viewing geometry in the SWIR and in the VNIR bands,  $\sigma_\Omega$ .

PROBA-V radiometric noise has been delivered by VITO (Sindy Sterckx, personal communication, September 2017) per camera and per band (Table 2). For SEVIRI, this term is computed considering (i) the instrument noise due to the dark current, (ii) the difference between the detectors gain and (iii) the number of digitalization levels (Govaerts and Lattanzio, 2007). The geolocation uncertainty  $\sigma_r$ , arising from the assumption of the satellite data being correctly mapped to the surface of the Earth, is estimated for each pixel  $\mathbf{p}$  as follows (Govaerts et al., 2010):

$$\sigma_r^2(t, \tilde{\lambda}, \mathbf{p}) = \left( \frac{\partial \mathbf{y}_0(t, \tilde{\lambda}, p_x, p_y)}{\partial p_x} \sigma_x(t, \tilde{\lambda}) \right)^2 + \left( \frac{\partial \mathbf{y}_0(t, \tilde{\lambda}, p_x, p_y)}{\partial p_y} \sigma_y(t, \tilde{\lambda}) \right)^2 \quad (1)$$

115 where  $\sigma_{x,y}$  is the geolocation/coregistration standard deviation and  $\mathbf{y}_0(t, \tilde{\lambda}, p_x, p_y)$  is the TOA BRF in the channel  $\tilde{\lambda}$  acquired at the time  $t$ .

The uncertainty  $\sigma_c$ , originating from the usage of a mean SRF for the three PROBA-V cameras, has been estimated simulating the TOA BRF considering both the mean and actual SRF for a wide range of observation conditions. The assessed  $\sigma_c$  is lower than 0.2% in all bands and for all cameras.

120 Finally, the assumption of having the same viewing geometry for the three PROBA-V bands is associated to the uncertainty  $\sigma_\Omega$ , computed as follows:

$$\sigma_\Omega^2(t, \tilde{\lambda}, \Omega, \mathbf{p}) = \left( \frac{\partial \mathbf{y}_0(t, \tilde{\lambda}, \theta)}{\partial \theta} \sigma_\theta^2(t, \tilde{\lambda}) \right) \quad (2)$$

The total relative radiometric uncertainty median values are shown in Table 3.

Table 3: Total radiometric uncertainty median values [%]

|         | 0.4 $\mu\text{m}$ | 0.6 $\mu\text{m}$ | 0.8 $\mu\text{m}$ | 1.6 $\mu\text{m}$ |
|---------|-------------------|-------------------|-------------------|-------------------|
| SEVIRI  |                   | 3                 | 2                 | 3                 |
| PROBA-V | 4                 | 3                 | 3                 | 4                 |

### 2.3 Ancillary data

In addition to satellite observations, a cloud mask and the model parameters information are re-  
 125 quired. For SEVIRI observations, the nowcasting Satellite Application Facility (SAF) cloud mask  
 (Meteo France, 2013), provided at the radiometer's native temporal and spatial resolution, is used;  
 for PROBA-V the cloud mask is provided by VITO (Wolters et al., 2018). The model parameters,  
*i.e.*, Total Column Water Vapour (TCWV), Total Column Ozone (TCO3) and surface pressure are  
 taken from the European Centre for Medium-Range Weather Forecasts (ECMWF) reanalysis (Dee  
 130 et al., 2011).

The uncertainties of the model parameters  $\mathbf{b}$  are converted into an equivalent noise  $\sigma_B$ , calculated  
 as follow (Govaerts et al., 2010):

$$\sigma_B^2(\mathbf{b}, \tilde{\lambda}, \Omega_0, \Omega_v) = \left( \frac{\partial y(\mathbf{x}, U_{oz}; \Omega, \tilde{\lambda})}{\partial U_{oz}} \sigma_{U_{oz}} \right)^2 + \left( \frac{\partial y(\mathbf{x}, U_{wv}; \Omega, \tilde{\lambda})}{\partial U_{wv}} \sigma_{U_{wv}} \right)^2 + \left( \frac{\partial y(\mathbf{x}, U_{sp}; \Omega, \tilde{\lambda})}{\partial U_{sp}} \sigma_{U_{sp}} \right)^2 \quad (3)$$

where  $U_{oz}$ ,  $U_{wv}$  are the ozone and water vapour total column concentration and  $U_{sp}$  is the surface  
 pressure and  $\sigma_{U_{oz}}$ ,  $\sigma_{U_{wv}}$  and  $\sigma_{U_{sp}}$  are their associated uncertainties. The surface pressure contribu-  
 tion to the signal is about 10 times smaller than the contribution of the water vapour concentration.  
 The TCWV is distributed among the two atmospheric layers in the forward radiative transfer model  
 135 assuming a US76 water vapour vertical profile (Sissenwine et al., 1976). The fraction of TCWV in  
 the scattering layer interacts with the aerosol particles and thus strongly affects the CISAR retrieval.  
 Unlike the ozone which is mainly present in the stratosphere, the water vapour is dominant in the  
 lower part of the atmosphere, severely impacting the aerosol retrieval in SEVIRI and PROBA-V  
 band 0.8  $\mu\text{m}$  (Table 4). Hence, only the uncertainty related to the TCWV is considered and Eq. 3 is  
 140 approximated to:

$$\sigma_B^2(\mathbf{b}, \tilde{\lambda}, \Omega_0, \Omega_v) \approx \left( \frac{\partial y(\mathbf{x}, U_{wv}; \Omega, \tilde{\lambda})}{\partial U_{wv}} \sigma_{U_{wv}} \right)^2 \quad (4)$$

The median values of the Equivalent Model Parameter Noise (EQMPN), computed as in Eq. 4,  
 are shown in Table 5.

Table 4: Water Vapour transmittance in the SEVIRI, PROBA-V and MODIS bands

|         | 0.4 $\mu\text{m}$ | 0.6 $\mu\text{m}$ | 0.8 $\mu\text{m}$ | 1.6 $\mu\text{m}$ |
|---------|-------------------|-------------------|-------------------|-------------------|
| SEVIRI  |                   | 0.993             | 0.915             | 0.988             |
| PROBA-V | 1.000             | 0.990             | 0.926             | 0.995             |
| MODIS   | 1.000             | 0.990             | 0.985             | 0.996             |

Table 5: Total EQMPN median values [%]

|         | 0.4 $\mu\text{m}$ | 0.6 $\mu\text{m}$ | 0.8 $\mu\text{m}$ | 1.6 $\mu\text{m}$ |
|---------|-------------------|-------------------|-------------------|-------------------|
| SEVIRI  |                   | 0.28              | 2.02              | 0.38              |
| PROBA-V | 0.01              | 0.37              | 1.49              | 0.14              |

## 2.4 Prior information

Within an OE framework, the definition of the prior information and its uncertainty plays a fundamental role. In CISAR four different sources of prior information are considered:

1. Surface parameters magnitude. The surface reflectance, represented by the RPV (Rahman-Pinty-Verstraete) model (Rahman et al., 1993), is not expected to undergo rapid variations on a short temporal scale, hence the retrieval in the previous accumulation period can be used as prior information for the next inversion (Govaerts et al., 2010). The prior information on the RPV parameters at the time  $t_d$  is built computing a running mean over the  $N_r$  previously-converged accumulation periods.

$$\mathbf{x}_b(t_d) = \frac{\sum_{t_i=0}^{t_d-1} \hat{\mathbf{x}}(t_i)}{N_r} \quad (5)$$

The corresponding prior uncertainty is defined as half of the variability range of the solution  $\hat{\mathbf{x}}(t_i)$  retrieved during the considered  $N_r$  accumulation periods.

$$\sigma_{\mathbf{x}_b}(t_d) = \frac{\max_{t \in N_r} \hat{\mathbf{x}}(t_i) - \min_{t \in N_r} \hat{\mathbf{x}}(t_i)}{2} \quad (6)$$

When  $N_r$  is smaller than a certain minimum threshold  $N_{min}$  (Table 7), the prior information on the magnitude of the RPV parameters is taken from the last successful retrieval and its uncertainty is computed as in Eq. 7, where  $N_d$  is the number of days since the last successful retrieval (Govaerts et al., 2017).

$$\sigma_{\mathbf{x}_b}(t_d) = \sigma_{\mathbf{x}_b}(t_d - 1) 1.05^{N_d} \quad (7)$$

2. AOT magnitude. This information is taken from an annual mean climatology dataset (Kinne et al., 2013). From this dataset, the prior information on the AOT magnitude for the coarse and fine mode (absorbing and non absorbing distinctly) is taken. The uncertainty is set to a high arbitrary value  $\sigma_{\mathbf{x}_b}$  for all the wavelengths (Table 7).
3. Constraints on the AOT temporal variability. These constraints result from the assumption that the AOT is not changing rapidly on a very short temporal scale, therefore a maximum temporal



variation is defined through a sigmoid function. The temporal constraints are described by the matrix  $\mathbf{H}_a$  in Eq. 13 of Part I.

- 155 4. Constraints on the AOT spectral variability. The AOT is expected to decrease with the wavelength, proportionally to the ratio of the extinction coefficient (see Eq. 15 of Part I). The applied constraints define the matrix  $\mathbf{H}_l$  (Eq. 14 of Part I).

## 2.5 Forward model

FASTRE, the CISAR forward Radiative Transfer Model (RTM), and its uncertainty  $\sigma_F$  are described in Sect. 4.4 of Part I. FASTRE uncertainty in the SEVIRI and PROBA-V processed bands has been 160 estimated as in Eq. 10 of Part I, comparing the outcome of FASTRE with a more elaborated RTM, where 50 atmospheric layers are considered. The results of this evaluation are shown in Table 6. The forward model uncertainty is lower than 3% in all processed bands, presenting its largest value in the SEVIRI VIS0.8 band, the most affected by water vapour absorption (Table 4). The FASTRE two-layer approximation of the atmosphere does not allow a correct discretisation of the water vapour 165 vertical profile and, thus, a correct characterisation of its interaction with the scattering particles. Moreover, the two-layer approximation assumes that the scattering particles are only present in the lower layer. Given the spectral behaviour of the AOT, this assumption leads to a higher uncertainty at wavelengths shorter than  $0.4 \mu\text{m}$  (Seidel et al., 2010). Despite the limitations associated to the two-layer approximation, FASTRE uncertainty is in the range of 1% - 3% (Table 6), which is smaller 170 or equal to the instrument radiometric noise.

Table 6: FASTRE relative uncertainty in the SEVIRI and PROBA-V processed bands [%]

|         | $0.4 \mu\text{m}$ | $0.6 \mu\text{m}$ | $0.8 \mu\text{m}$ | $1.6 \mu\text{m}$ |
|---------|-------------------|-------------------|-------------------|-------------------|
| SEVIRI  |                   | 1.88              | 2.75              | 0.96              |
| PROBA-V | 2.38              | 1.31              | 2.20              | 0.75              |

## 3 Data processing

### 3.1 General setup

In order to perform the inversion on actual satellite data, the observations are accumulated in time and the corresponding uncertainty is computed as described in Sect. 2. This temporal accumulation is 175 performed in order to build a multi-angular observation vector  $\mathbf{y}_{\Omega\bar{\lambda}}$  to characterise surface reflectance anisotropy. The surface optical properties are considered invariant during the accumulation period, and therefore a trade-off between having enough cloud free observations to build the observation vector and allowing the algorithm to catch surface variations is introduced; the high-repeat tempo-

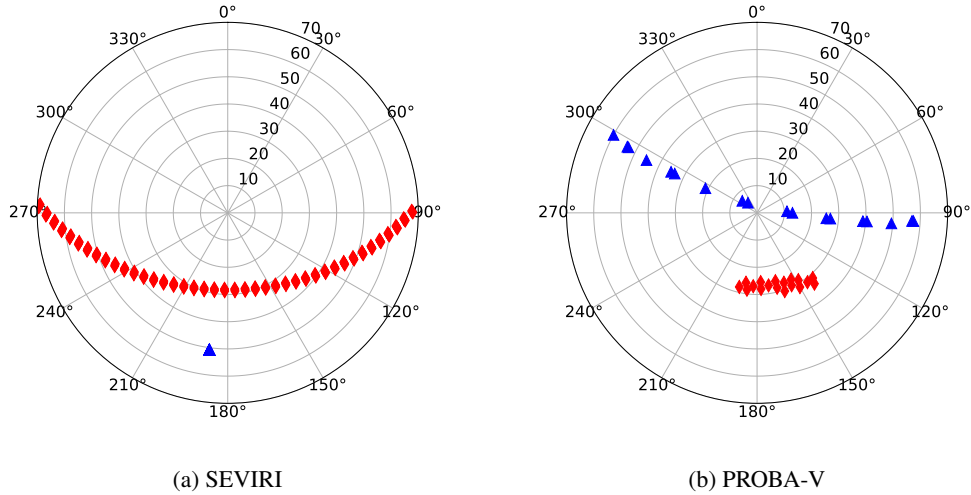

Fig. 3: Polar plot of the angular sampling during a 5 days (2015/05/01-2015/05/05) of SEVIRI observations (left panel) and during 16 days (2015/05/01-2015/05/16) of PROBA-V observations (right panel) over Carpentras, France. The blue triangles represent the satellite viewing angles, the red diamonds the illumination one. Circles represent the zenith angle and polar angles represent azimuth angles with zero azimuth pointing to the North.

ral coverage of geostationary satellites allows a shorter accumulation periods with respect to polar  
 180 orbiting instruments. For SEVIRI acquisitions, although the angular sampling does not vary much  
 from one day to the next, the length of the accumulation period is set to 5 days in order to maximise  
 the occurrence of cloud free observations. For polar orbiting satellites, the length of the temporal  
 accumulation is normally driven by the repeat cycle, as it is the case for MODIS (DAAC, 2018).  
 In the case of PROBA-V, the satellite orbit is not maintained and there is no repeat cycle. Hence,  
 185 the choice of the length of the time window during which the satellite observations are accumulated  
 results from empirical studies aims at balancing the trade-off previously described. Consequently,  
 the length of the accumulation is set to 16 days and the successive accumulation periods are shifted  
 by 8 days. An example of the angular sampling during this accumulation period is shown in Fig.  
 3 for SEVIRI and PROBA-V. During the accumulation period, observations acquired with a sun or  
 190 viewing angle larger than  $\theta_{max}$  (defined in Table 7) are discarded.

The definition of the first guess is an important aspect of the inversion process and it is defined  
 in order to minimise the possibility of finding local minima. When a minimum value is found, an  
 investigation of the cost function in the vicinity of the solution should be made in order to deter-  
 mine whether or not it is a local minimum. However, this exploration could be computationally  
 expensive. In order to minimise the possibility of local minima without degrading the computational  
 performances, the AOT first guess is assigned to successive observations alternating between a low  
 value  $\tau_{low}$  and a larger one  $\tau_{high}$  (see Table 7). As CISAR retrieves one single set of RPV param-  
 eters over the entire accumulation period in each processed band, only one set of first guesses  $\mathbf{x}_0$  is

Table 7: CISAR setup parameters

|                        |                                                                        | SEVIRI | PROBA-V |
|------------------------|------------------------------------------------------------------------|--------|---------|
| $N_d$                  | Length of the accumulation period                                      | 5      | 16      |
| $N_s$                  | Shift between the accumulation period                                  | 5      | 8       |
| $N_{min}$              | Minimum converged retrievals to compute the mean on the RPV parameters | 5      | 5       |
| -                      | Maximum number of iterations                                           | 20     | 20      |
| $\theta_{max}$         | Maximum processed sun and viewing zenith angles [°]                    | 70     | 70      |
| $\tau_{low}$           | Minimum AOT first guess value                                          | 0.001  | 0.001   |
| $\tau_{high}$          | Maximum AOT first guess value                                          | 0.100  | 0.100   |
| $\sigma_{x_b, \tau_F}$ | Fine mode prior uncertainty for the AOT                                | 1.0    | 1.0     |
| $\sigma_{x_b, \tau_C}$ | Coarse mode prior uncertainty for the AOT                              | 2.0    | 2.0     |
| $\sigma_{x_b, RPV}$    | Default prior uncertainty for the RPV parameters                       | 1.0    | 1.0     |

defined:

$$\mathbf{x}_0(t_d) = \mathbf{x}_b(t_d) + (-1)^{i_{t_d}} * \sigma_{\mathbf{x}_b}(t_d) \quad (8)$$

where  $i_{t_d}$  is the index of the current accumulation period and  $\mathbf{x}_b$  is the prior information at the accumulation period  $t_d$ .

From the retrieved set of RPV parameters the BHR is calculated, assuming perfectly diffuse illumination conditions, and the AOT is extrapolated at  $0.55 \mu\text{m}$  through the extinction coefficient  $\alpha$ :

$$\tau_{0.55, v} = \tau_{\lambda, v} \left( \frac{\alpha_{0.55, v}}{\alpha_{\lambda, v}} \right) \quad (9)$$

where  $v$  is the considered aerosol vertex and  $\lambda$  is the wavelength from which the AOT at  $0.55 \mu\text{m}$  is extrapolated.

### 195 3.2 Aerosol vertices

The choice of the aerosol vertices subsamples the entire solution space to a region where the aerosol properties can be retrieved. The relationship between the particle size and the single scattering properties has been discussed in Part I. As recommended, three vertices are selected, defined by the asymmetry factor  $g$  and the Single Scattering Albedo (SSA)  $\omega_0$ : two fine mode vertices, absorbing and non-absorbing, and one coarse mode vertex, defining a triangle in the  $[g, \omega_0]$  space in each processed band. The three vertices are chosen analysing the single scattering properties derived from the AERONET inversion product on all available observations since 1993 (Dubovik et al., 2006), similarly to the approach proposed by Govaerts et al. (2010). The aerosol single scattering properties distribution in the  $[g, \omega_0]$  space, as derived from AERONET inversion product, is shown in Fig. 4 for  $\lambda = 0.6 \mu\text{m}$ . The aerosol properties are clustered in the region defined by  $0.60 < g < 0.80$  and  $0.85 < \omega_0 < 0.98$ , containing 68.3% of the data (blue line). The selected CISAR vertices defining the solution space cover about the 80% of possible solutions (black triangle).

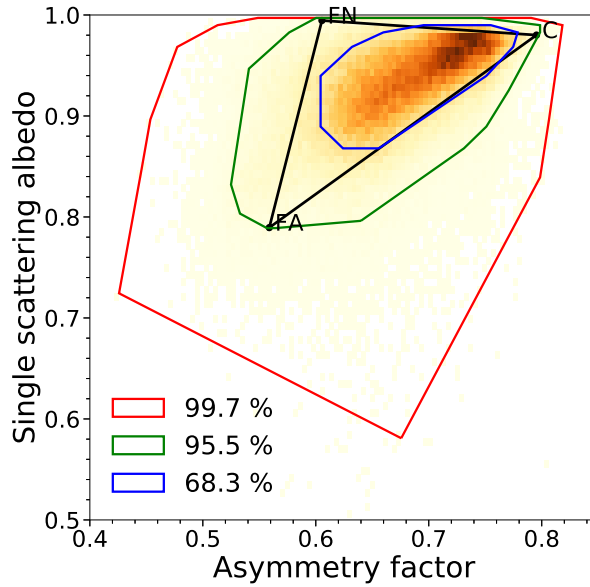

Fig. 4: Solution space (black triangle) for the wavelength  $0.6 \mu\text{m}$  defined by the non absorbing fine mode (FN), the absorbing fine mode (FA) and the coarse mode (C) vertices. The red, green and blue lines show respectively the 99.7%, 95.5% and 68.3% probability regions respectively, as derived from AERONET inversion product for all the observations available over all the AERONET stations.

#### 4 Information content

The analysis of the information content relies on a two-fold approach. First, the Jacobians are used  
 210 as an indicator of the TOA BRF sensitivity to state variable changes under different observation  
 conditions. Next, the entropy is used as a rigorous metric to determine the information content of  
 the observation system for each radiometer. The Jacobians, *i.e.*, the partial derivatives of the forward  
 model with respect to the state variables, are affected by the changes in illumination and viewing  
 geometry both in terms of sign and magnitude (Luffarelli et al., 2016). The minimisation of the  
 215 cost function relies on an iterative approach where the direction of steepest descent is determined by  
 the Jacobians (Marquardt, 1963). An analysis of the Jacobians gives information about the amount  
 of information carried by the observation and the challenges associated to its sign and magnitude  
 variations throughout the year. The larger the magnitude of the Jacobians, the higher the sensitivity  
 of the signal on the selected state variable. The Jacobians have been scaled by the variability range  
 220 of each state variable to compare their dimensionless magnitude.

An illustrative example of the distributions of the Jacobians relative to the RPV parameters is  
 shown in Fig. 5. The Jacobians are dominated by the  $\rho_0$  parameter (controlling the magnitude  
 of the surface BRF), followed by  $\theta$ ,  $k$  and  $\rho_c$  (characterising the surface reflectance anisotropy).  
 Consequently, the retrieval of the surface reflectance shape is more challenging than the retrieval  
 225 of its mean magnitude; nevertheless, its accurate retrieval is necessary to correctly account for the

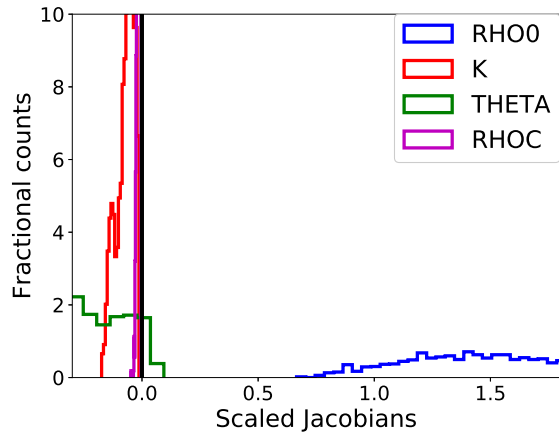

Fig. 5: Histograms of the distribution of the scaled Jacobians related to the RPV parameters (x-axis), scaled by the variability range of each variable. These distributions are obtained from PROBA-V observations (RED band) over Carpentras, France (vegetated target). Positive (negative) values of the Jacobian show that the TOA BRF is positively (negatively) correlated to the considered state variable.

coupling between the surface and the atmosphere (Govaerts et al., 2008).

The aerosol contribution to the TOA BRF differs according to the brightness of the surface. Figure 6 shows the AOT scaled Jacobians distribution over Carpentras (dark surface) and Zinder Airport (bright surface). The Jacobians over Carpentras reach higher values with respect to the Jacobians related to Zinder Airport, because the signal at Zinder is dominated by the bright surface (Sun et al., 2016). When the magnitude of the AOT Jacobian is close to 0, the observed TOA BRF is not sensitive to changes in the aerosol concentration in the atmosphere. It is worth noticing that the AOT scaled Jacobians can be both negative and positive, meaning that the aerosols can increase or decrease the

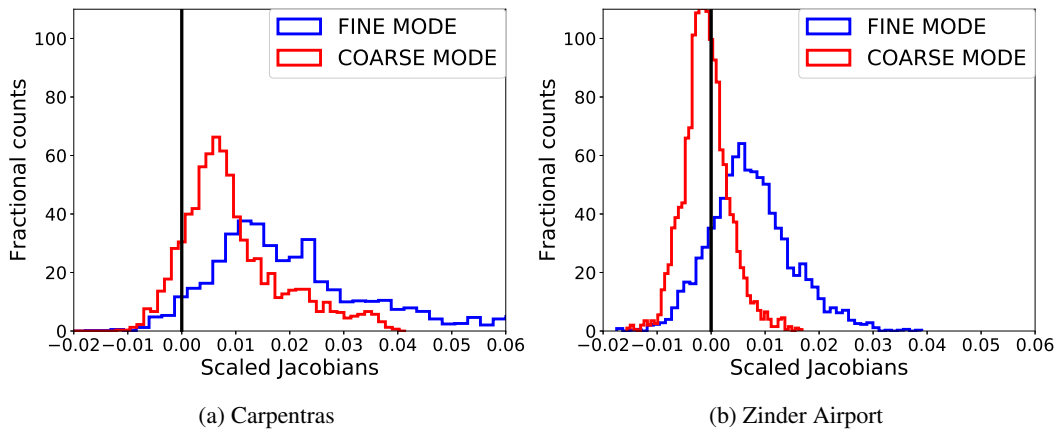

Fig. 6: Distribution of the AOT scaled Jacobian over Carpentras (dark surface) and Zinder Airport (bright surface). The histograms are obtained from PROBA-V observations (RED band) over year 2015.

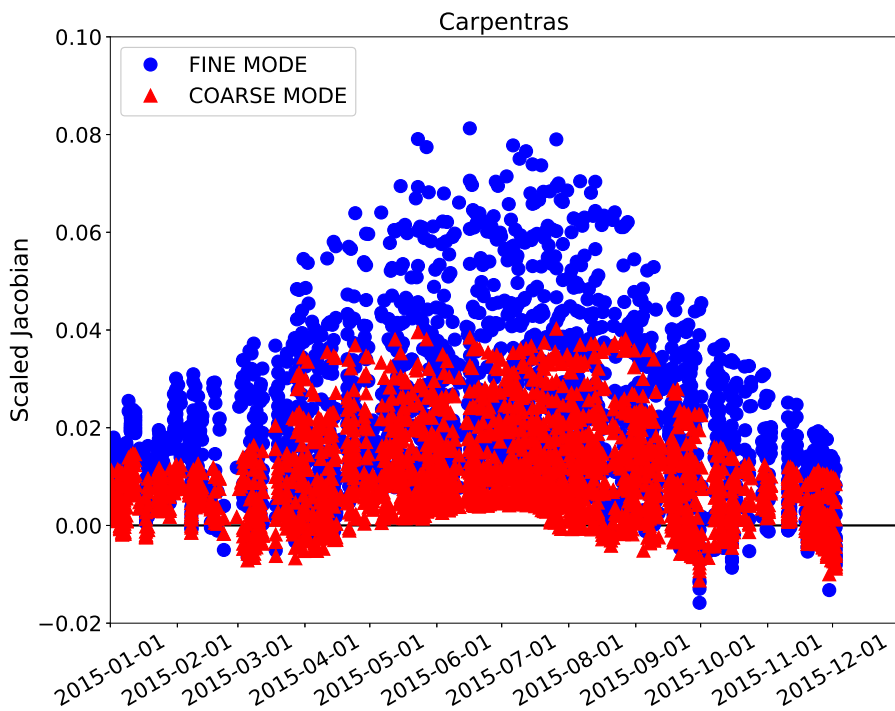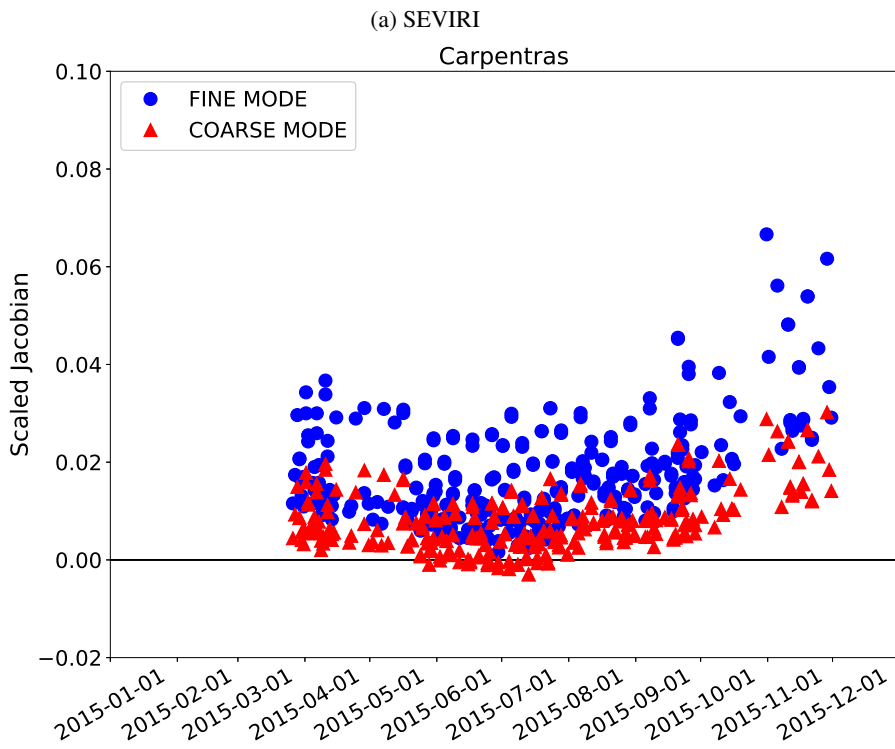

Fig. 7: Scaled AOT Jacobians timeseries over Carpentras, France (vegetated target) related to SEVIRI VIS0.6 band (top panel) and PROBA-V RED band (bottom panel) observations. The blue dots represent the fine mode, the red triangles the coarse mode.

Table 8: Median and standard deviation of the scaled Jacobians. The table refers to all processed targets during 2015. The values are shown for the SEVIRI and PROBA-V bands centred at  $0.6 \mu\text{m}$ .

|          | Median value | Standard deviation |
|----------|--------------|--------------------|
| $\rho_0$ | 1.316        | 0.385              |
| $\kappa$ | -0.008       | 0.038              |
| $\theta$ | -0.250       | 0.265              |
| $\rho_c$ | -0.023       | 0.023              |
| $\tau_F$ | 0.017        | 0.014              |
| $\tau_C$ | 0.007        | 0.008              |

TOA BRF depending on the season and the viewing and illumination geometry. This variability of  
 235 the sign of the Jacobians, occurring also over dark target (Fig. 6a), represents one limitation in the  
 MODIS Dense Dark Vegetation (DDV) algorithm (Kaufman et al., 1997), which assumes that an  
 increase in the AOT results in an increased signal at the satellite.

Table 8 shows the median value and the standard deviation of the scaled Jacobians for all the state  
 variables at SEVIRI and PROBA-V bands centred at  $0.6 \mu\text{m}$ , over all selected AERONET stations.  
 240 This Table confirms the previous findings on the Jacobians magnitude shown in Fig. 5 and 6 over  
 Carpentras and Zinder Airport. The AOT scaled Jacobian is about 2 orders of magnitude smaller  
 than the one of the magnitude of the surface reflectance. The variability of the Jacobian sign and  
 magnitude along the year is illustrated in Fig. 7, where it can be seen that the effect of the aerosols  
 on the reflectance can vary with the geometry for the same land cover type. The Jacobian variations  
 245 in Fig. 7 essentially depend on the viewing and illumination geometry. Aerosol particles mostly  
 scatter in the forward direction, given the positive sign of the asymmetry factor  $g$  (controlled, among  
 other factors, by the aerosol size distribution) (Andrews et al., 2006). For this reason, the maximum  
 information on the aerosols is located in the forward direction, while it decreases when approaching  
 the backscattering direction. Additionally, a longer atmospheric path increases the aerosol effects  
 250 on the reflectance, given the higher probability of interactions between the reflected sunlight and  
 the atmospheric particles. The impact of the length of the atmospheric path is highlighted in Fig.  
 8, showing the Jacobian daily cycle over Carpentras. The sensitivity of the TOA BRF with respect  
 to the AOT almost disappears at noon, when the atmospheric path is shortest and the effect of the  
 aerosol on the signal is minimised. A more detailed analysis of the AOT Jacobians and their relation  
 255 with the AOT magnitude is performed by Luffarelli et al. (2016). Given the seasonal variations of  
 the Jacobians, shown in Fig. 7 and 8, it is not expected to get the same accuracy of the retrieval  
 throughout the day and throughout the year.

A more rigorous analysis of the information content can be made through the entropy, which  
 measure the uncertainty reduction (Rodgers, 2000). In an OE framework, the prior information and  
 its uncertainty represent an hypothesis on the expected value of the state variables. It is envisaged

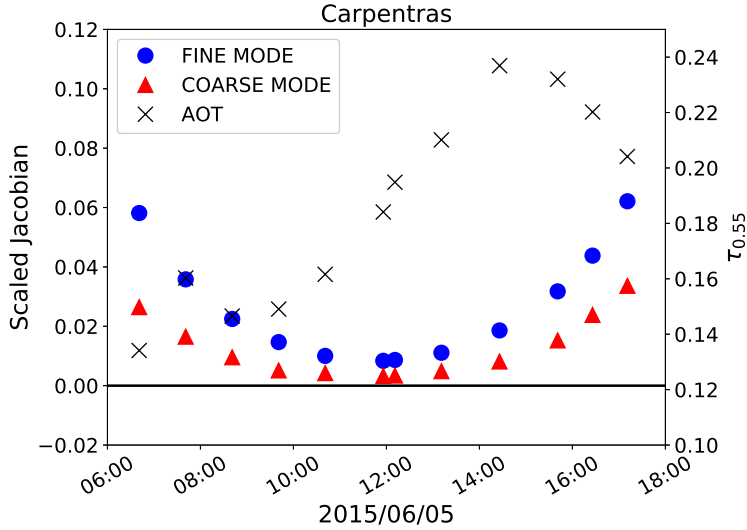

Fig. 8: Scaled AOT Jacobians (left y-axis) associated to SEVIRI observation in the VIS0.6 band over Carpentras, France, for 2015/6/5. The blue dots represent the fine mode, the red triangles the coarse mode. The black crosses represent the retrieved AOT at  $0.55 \mu\text{m}$  (right y-axis).

that the inversion process provides a posterior uncertainty on the state variables which is smaller than the prior one; the entropy quantifies this uncertainty reduction. When there is no information coming from the satellite observations, the entropy will be close to 0 as the observation does not add any additional knowledge on the system. Formally, the entropy is computed as follows:

$$H = -\frac{1}{2} \ln \left( \frac{|\mathbf{S}_{\hat{x}}|}{|\mathbf{S}_x|} \right) \quad (10)$$

where  $\mathbf{S}_{\hat{x}}$  (Eq. 21 of Part I) and  $\mathbf{S}_x$  are the uncertainties of the posterior and the prior information respectively.

260 In CISAR, the entropy is calculated considering the surface and atmospheric state variables and their associated prior and posterior uncertainty separately; the entropy distribution is shown in Fig. 9. The distribution of the surface and AOT entropy related to SEVIRI observations exhibits higher values compared to the one related to PROBA-V observations, given the larger radiometric uncertainty associated to the observations acquired by the polar orbiting satellite. The entropy depends not only  
 265 on the information carried by the satellite observation, but also on the uncertainty associated to the prior information. As the prior information on the surface is updated (Sect. 2.4), the associated uncertainty decreases in time, whereas the prior information on the AOT remains weakly constrained, as the uncertainty is kept to the default high value. For this reason the entropy associated to the RPV parameters exhibits smaller value than the one associated to the AOT (Fig. 9a).



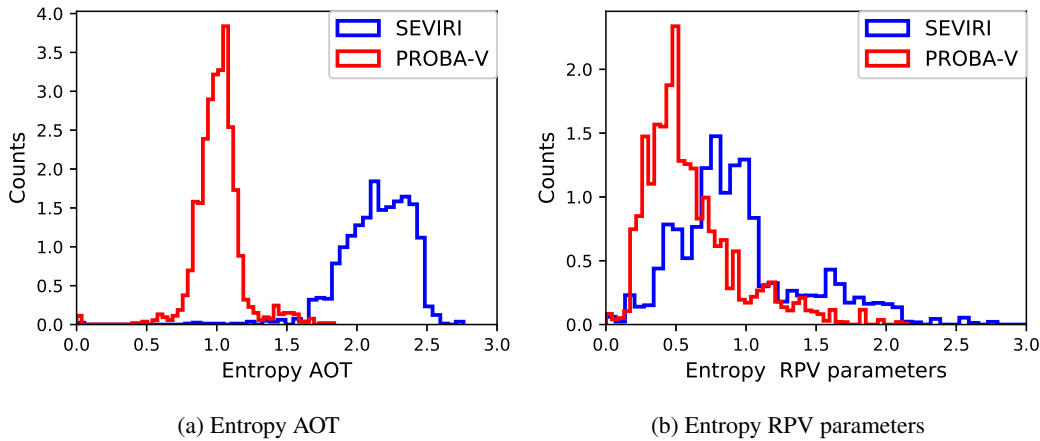

Fig. 9: Distribution of the entropy related to the AOT (left panel) and to the RPV parameters (right panel).

## 270 5 Quality indicator

### 5.1 Review of existing methods

Section 2.5 discussed the limitations of the forward model FASTRE. Furthermore, in Sect. 4 it has been shown how the AOT Jacobian magnitude is subject to temporal variations, depending on the viewing and illumination geometries. These issues compromise the reliability of the retrieved solution, which can however be assessed using different methods. Dubovik et al. (2011) use the relative fitting measurement residual, to filter the retrieval outliers. Such an approach presents some limitations as the number of degrees of freedom can vary depending on the availability of cloud free observations. The requirement on the quality of the fit should be stricter when only a limited number of observations is available (Govaerts et al., 2010). To address this specific issue, Govaerts and Lattanzio (2007) developed an approach which also takes into account the number of cloud free observations. The authors observed that the cost function is proportional to the quadratic sum of the mismatch between the simulation and the observation for each acquisition, weighted by the observation uncertainty. As the cost function is strongly dependent on the number of observations, it is not possible to define a universal range of acceptable values for its residual without performing additional operations on the cost function. Both methods do not correctly identify situations in which a good fit is reached but the retrieval of the state variables is not reliable, due to limited or no dependency of the TOA BRDF on the state variables (the Jacobians are close to 0). A more elaborate QI has been developed for the MODIS Aerosol Product Collection 6 (Hubanks, 2017), which is composed of different tests accounting for the fitting residual, the magnitude of the retrieved AOT, the possible presence of cirrus, the brightness of the scene and information on the number of pixels and the percentage of water pixels present in the processed area. Despite taking into account different factors in addition to fitting residuals, this approach does not consider the actual information content

of the satellite observation. Moreover, as CISAR processes each pixel independently, the information on the number and type of pixels over which the retrieval is performed, as used in the MODIS product, is not applicable within this method.

## 5.2 Overview

A new approach is proposed for the CISAR algorithm, which combines a series of individual tests  $j$  with an associated value  $p_j$  in the range  $[0,1]$ , defining a  $QI(t_i)$  associated to the solution retrieved at the time  $t_i$ . These tests are performed on the convergence of the inversion to a solution after a given number of iterations (0), on the validity range of the total AOT (1) and surface albedo (2), on the mismatch between observations and simulations (3) and on the information content of the satellite acquisition through the Jacobians (4) and the entropy, as discussed in Sect. 4. The entropy is computed separately for the AOT (5) and RPV parameters (6). These tests have been defined through an analysis of their impact on CISAR performance when evaluated against independent reference datasets. The value  $p_j$  associated to each test can assume values between 0 (bad quality) and 1 (good quality). Figure 10 shows an example of the evaluation of the retrieved AOT against AERONET data for the mismatch test (3). As the mismatch increases, the correlation decreases, while the RMSE shows opposite behaviour.

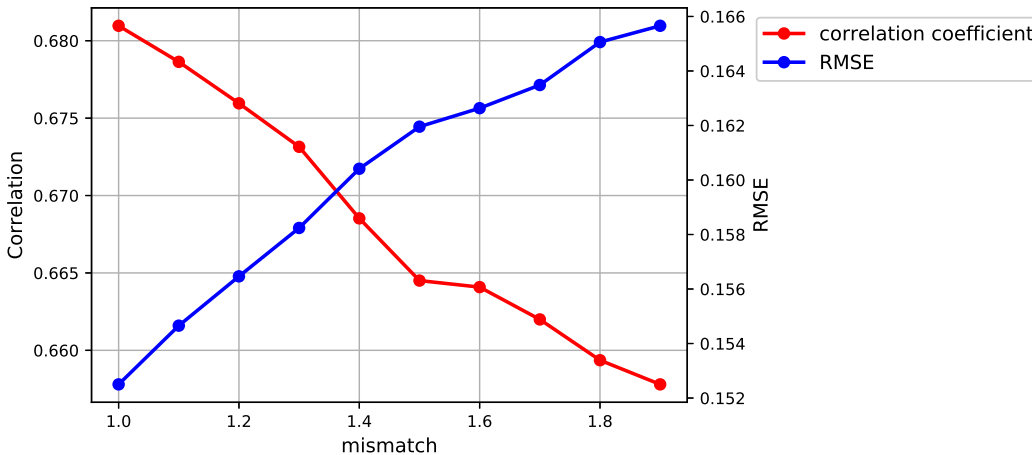

Fig. 10: Correlation (in red) and RMSE (in blue) variations in function of the mismatch between the satellite observation and the simulated signal (test 3). The figure refers to the CISAR AOT retrieval evaluation against AERONET data. These results are obtain from CISAR applied to SEVIRI observations.

### 5.3 Quality indicator tests

#### 310 5.3.1 Convergence

The first test to be performed is on the convergence of the inversion. When the maximum number of iteration is reached  $p_0$  is equal to 0, otherwise  $p_0 = 1$ .

#### 5.3.2 State variable validity range

The validity of the retrieved total AOT and of the surface BHR is examined in the tests 1 and 2.  
 315 In CISAR, a validity range for each state variable is defined, based on physical boundaries and empirical observations. When the value of retrieved AOT (BHR) falls on the extremes of this range,  $p_1$  ( $p_2$ ) is equal to 0. The acceptable values for the BHR range from 0 to 1, while the AOT can only assume positive values smaller than 5. The values  $p_1$  and  $p_2$  are equal to 1 when  $0 < BHR < 1$  and  $0 < AOT < 5$  respectively.

#### 320 5.3.3 Mismatch between observation and simulation

As discussed in Sect. 5.1, the fitting residual between the observation and the simulation is normally used to assess the reliability of the solution, as it describes how well the signal simulated with the forward model  $\mathbf{y}_m(t_i, \lambda)$  fits the satellite observations  $\mathbf{y}_0(t_i, \lambda)$ . The mismatch between the observed and simulated TOA BRF is weighted by the observations uncertainty  $\sigma_0(t_i, \lambda)$ . For this test, the  
 325 largest mismatch among the processed bands is considered. Two thresholds  $T_1$  and  $T_2$  are defined to identify good ( $p_3 = 1$ ) and bad ( $p_3 = 0$ ) quality retrievals. The difference between the simulated signal and the satellite observation should have the same magnitude as the observation uncertainty  $\sigma_0(t_i, \lambda)$ , therefore the  $T_1$  is set to 1. Conversely, the maximum acceptable mismatch value  $T_2 = 2$  has been chosen observing the relation between the mismatch and the performances of CISAR when  
 330 evaluated against independent datasets used as reference. Fig. 10 represents an example of this analysis. When the mismatch assumes values within the range defined by  $T_1$  and  $T_2$ , thresholds included, a value between a minimum  $m$  and 1 is assigned to  $p_3$  through a sigmoid function with width equal to  $10/(T_2 - T_1)$  (Fig. 11). A different coefficient  $m$  is defined for each test  $j$  in order to give different weights to the tests, according to the magnitude of their impact on the retrieved  
 335 solution and its evaluation against the reference dataset. The outcome of the test 3 is thus defined as follows:

$$\left\{ \begin{array}{ll} p_3(t_i) = 0 & \text{if } \max_{\lambda} \left\{ \frac{|y_m(t_i, \lambda) - y_0(t_i, \lambda)|}{\sigma_0(t_i, \lambda)} \right\} > T_2 \\ p_3(t_i) = 1 & \text{if } \max_{\lambda} \left\{ \frac{|y_m(t_i, \lambda) - y_0(t_i, \lambda)|}{\sigma_0(t_i, \lambda)} \right\} < T_1 \\ m < p_3(t_i) < 1 & \text{if } T_1 \leq \max_{\lambda} \left\{ \frac{|y_m(t_i, \lambda) - y_0(t_i, \lambda)|}{\sigma_0(t_i, \lambda)} \right\} \leq T_2 \end{array} \right. \quad (11)$$

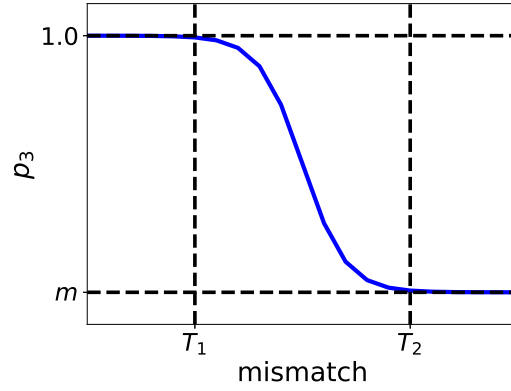

Fig. 11: Non linear  $p_3$  definition between the minimum value  $m$  and 1 which applies when the mismatch is larger than  $T_1$  and smaller than  $T_2$ .

with  $\lambda=1, \dots$ , number of wavelengths.

### 5.3.4 Jacobians

The magnitude of the Jacobians gives information on the sensitivity of the TOA BRF on the state variables. Performing a test on the Jacobians related to each state variable can be computationally expensive. In order to reduce the computational effort, only the Jacobian of the AOT is taken into account. The spectral constraints applied to the AOT variability as in Sect. 2.4 impose a correlation between the AOT retrieved in the different spectral bands. Consequently, it is desirable to have large absolute Jacobians in at least one band. To have a good retrieval of the total AOT, the AOT associated to each aerosol vertex has to be correctly retrieved. The quantity  $\hat{K}_x(t_i)$  analysed in the test 4 is thus the following:

$$\hat{K}_x(t_i) = \max_{\lambda} \left\{ \min_v \{ |K_{x,\lambda,v}(t_i)| \} \right\} \quad (12)$$

with  $\lambda=1, \dots$ , number of wavelengths and  $v=1, \dots$ , number of aerosol vertices.

The aim of this test is to discard observations with little or no sensitivity to the AOT, identifying those situations where the test on the miss-fit is successful because of the prior information and/or the temporal and spectral constraints (Sect. 2.1) rather than actual information coming from the observations. The thresholds  $T_1$  and  $T_2$  are set to 0.01 and 0.02 respectively. The values of  $p_4$  are defined similarly to  $p_3$ :

$$\left\{ \begin{array}{ll} p_4(t_i) = 0 & \text{if } \hat{K}_x(t_i) < T_1 \\ p_4(t_i) = 1 & \text{if } \hat{K}_x(t_i) > T_2 \\ m < p_4(t_i) < 1 & \text{if } T_1 \leq \hat{K}_x(t_i) \leq T_2 \end{array} \right. \quad (13)$$

### 5.3.5 Entropy

Section 4 discusses how the entropy, quantifying the uncertainty reduction from the prior knowl-  
 355 edge on the system to the posterior uncertainty, represents a rigorous analysis of the information  
 content. Tests 5 and 6 analyse the entropy associated to the AOT and the one associated to the RPV  
 parameters, computed as follows:

$$\begin{aligned} H_{AOT}(t_i) &= -\frac{1}{2N_\lambda} \ln \left( \frac{\prod_\lambda \prod_v \sigma_{post}(t_i, \lambda, v)}{\prod_\lambda \prod_v \sigma_{prior}(t_i, \lambda, v)} \right) \\ H_{RPV}(t_i) &= -\frac{1}{2N_\lambda} \ln \left( \frac{\prod_\lambda \prod_p \sigma_{post}(t_i, \lambda, p)}{\prod_\lambda \prod_p \sigma_{prior}(t_i, \lambda, p)} \right) \end{aligned} \quad (14)$$

where  $N_\lambda$  is the number of processed wavelengths,  $\lambda=1, \dots, N_\lambda$ ,  $p=1, \dots$ , number of RPV parameters  
 and  $v=1, \dots$ , number of aerosol vertices. The normalization to  $N_\lambda$  assures consistency in the entropy  
 360 evaluation when different number of bands are analysed, as for SEVIRI and PROBA-V cases. The  
 entropy computation is strongly dependent on the magnitude of the prior uncertainty as explained in  
 Sect. 4. Low entropy might be due to reliable prior information, with a low associated uncertainty.  
 Similarly, the uncertainty reduction would be very large in case of little prior information on the state  
 variable. For these reasons, tests 5 and 6 are only performed when the prior uncertainty is smaller  
 365 than the validity range of the AOT and RPV respectively and larger than 1/6 of it. The thresholds  
 associated to the two tests on the entropy are  $T_1 = 0.1$  and  $T_2 = 0.6$  that correspond to a 20% and  
 70% uncertainty reduction respectively. The values  $p_5(t_i)$  and  $p_6(t_i)$  are computed as in Eq. 15.

$$\begin{cases} p_{5,6}(t_i) = 0 & \text{if } H_{AOT}(t_i), H_{RPV}(t_i) < T_1 \\ p_{5,6}(t_i) = 1 & \text{if } H_{AOT}(t_i), H_{RPV}(t_i) > T_2 \\ m < p_{5,6}(t_i) < 1 & \text{if } T_1 \leq H_{AOT}(t_i), H_{RPV}(t_i) \leq T_2 \end{cases} \quad (15)$$

### 5.4 Quality indicator computation

The final QI is computed combining the results of the tests performed on the retrieved solution:

$$QI(t_i) = p_0(t_i)p_1(t_i)p_2(t_i) \max \left\{ 1 - \sum_{j=3}^6 (1 - p_j(t_i)), 0 \right\} \quad (16)$$

370 The final  $QI(t_i)$  ranges from 0 to 1, where 0 designate a poor quality retrieval and 1 indicates a  
 reliable solution. Figure 12 shows the variations of the correlation and the RMSE between CISAR  
 retrieved AOT and AERONET data as a function of the QI. Correlation increases as QI is taking  
 larger values, while the RMSE decreases. This behaviour is observed with CISAR AOT retrieved  
 from both SEVIRI and PROBA-V observations (Fig. 12). This correlation increase (RMSE de-  
 375 crease) is particularly visible when QI is taking values between 0.0 and 0.2. For this reason, only  
 retrievals with  $QI \geq 0.2$  are considered in Sect.6.

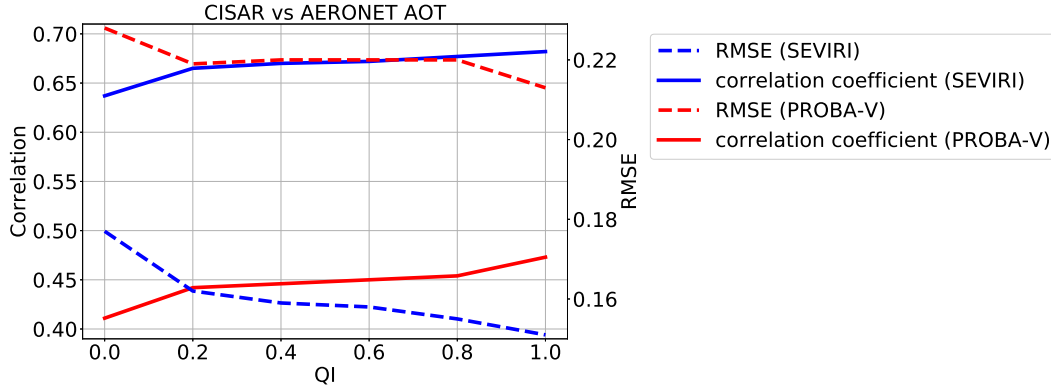

Fig. 12: Correlation (straight lines) and RMSE (dashed lines) variations in function of the QI. The figure refers to the CISAR AOT retrieval from SEVIRI (in blue) and PROBA-V (in red) observations evaluated against AERONET data.

## 6 Performance evaluation

### 6.1 BHR

The CISAR BHR, computed from the RPV parameters, is compared with the MODIS Land product (Schaaf and Wang, 2015). To account for the different spatial sampling, the MODIS data have been averaged on 5x5 km and 1x1 km for the comparison with the retrievals from SEVIRI and PROBA-V respectively. The results of this comparison are shown in Table 9 in terms of correlation, Root Mean Square Error (RMSE), and Mean Absolute Error (MAE). The CISAR results show a high correlation with the MODIS product, higher than 0.7 in all the processed spectral bands, except the PROBA-V NIR band, which shows a correlation equal to 0.618. The density plots of the CISAR BHR retrievals against MODIS data are included in the Supplement for all the processed bands, for both satellites. Despite the instrument differences discussed in Sect. 2.5, the CISAR retrievals and the MODIS Land Product dataset show similar seasonal trends. Figure 13 shows the BHR timeseries over Zinder Airport (Niger, Africa), as retrieved from the CISAR algorithm applied to SEVIRI and PROBA-V observations and from the MODIS Land Product. The rainy season, going from May 20

Table 9: CISAR retrieved BHR from actual observations comparison with MODIS in all the processed bands.

|                        | SEVIRI            |                   |                   | PROBA-V           |                   |                   |                   |
|------------------------|-------------------|-------------------|-------------------|-------------------|-------------------|-------------------|-------------------|
|                        | 0.6 $\mu\text{m}$ | 0.8 $\mu\text{m}$ | 1.6 $\mu\text{m}$ | 0.4 $\mu\text{m}$ | 0.6 $\mu\text{m}$ | 0.8 $\mu\text{m}$ | 1.6 $\mu\text{m}$ |
| Number of points       | 7409              |                   |                   | 744               |                   |                   |                   |
| Correlation            | 0.917             | 0.779             | 0.854             | 0.743             | 0.864             | 0.618             | 0.841             |
| Root Mean Square Error | 0.045             | 0.067             | 0.079             | 0.029             | 0.052             | 0.098             | 0.091             |
| Mean Absolute Bias     | 0.039             | 0.067             | 0.067             | 0.025             | 0.045             | 0.070             | 0.077             |

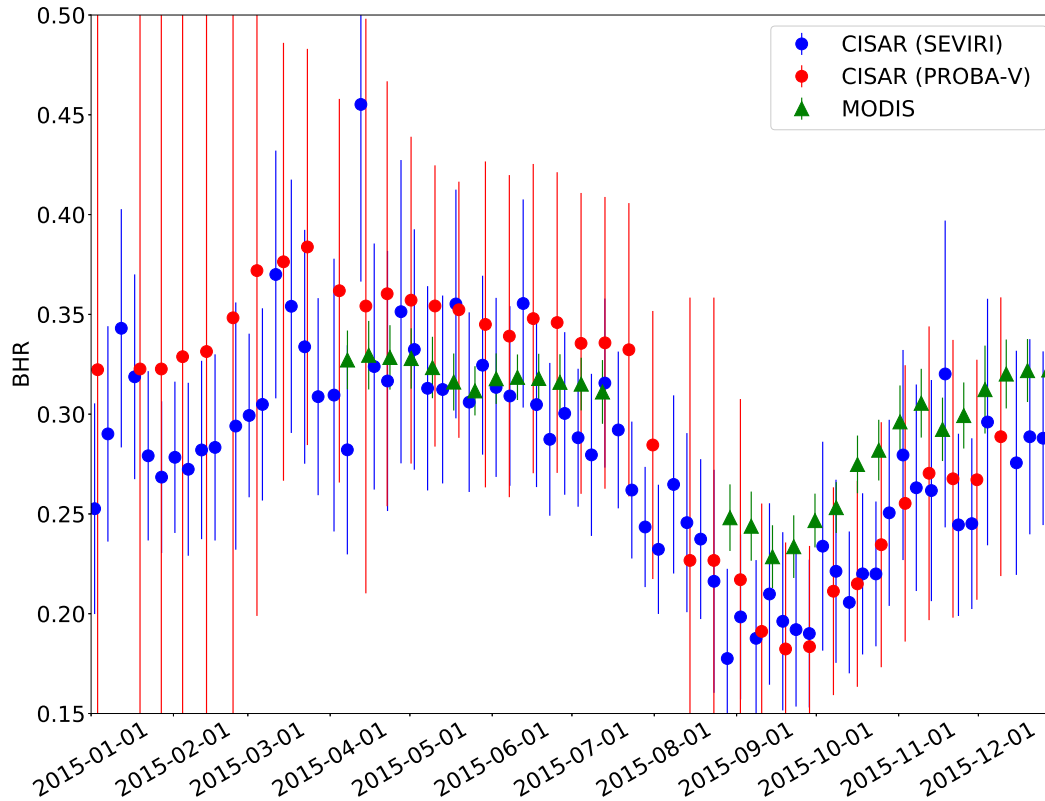

Fig. 13: CISAR retrieved BHR from SEVIRI (blue dots) and PROBA-V (red dots) and MODIS Land Product (green triangle) over Zinder Airport (Niger, Africa). The results are shown for the sensors band centred at  $0.6 \mu m$ , for year 2015. The vertical bars represent the retrieval uncertainty for SEVIRI and PROBA-V and standard deviation over the selected area for MODIS.

to October 5 (Weatherspark.com, 2018), is distinguishable through the decrease of the surface BHR in both the MODIS and CISAR datasets, although CISAR retrieves a larger seasonal variation with respect to MODIS product. The effect of the updating mechanism on the surface prior described in Sect. 2.4 is also visible as the retrieval uncertainty decreases in time, given that the prior information  
 395 on the surface is better defined.

## 6.2 Aerosol Optical Thickness

The CISAR AOT retrieval, extrapolated at  $0.55 \mu m$  has been evaluated against AERONET data over the selected targets listed in Sect. 2. CISAR AOT retrieval is evaluated in terms of correlation, RMSE, MAE with respect to AERONET values. Additionally, the percentage of points falling within  
 400 the Global Climate Observation System (GCOS) requirements (Systematic Observation Requirements for Satellite-Based Data Products for Climate, 2011 Update), defined as  $\max\{0.03, 10\%\}$ , is also accounted for. The GCOS requirements are a useful tool to compare different algorithms' performances. However, both SEVIRI and PROBA-V missions were not originally designed for

AOT retrieval. The GCOS requirement of 0.03 for low optical thickness translates into a radiometric noise requirement much better than 2 (1)% at 0.4 (0.6)  $\mu\text{m}$ , way below the radiometric performance of the SEVIRI and PROBA-V instruments (Table 3). The duration of the corresponding missions provides however a decisive advantage for the generation of AOT datasets from these instruments. In the following, the GCOS requirements are evaluated in terms of percentage of retrievals satisfying them.

Figure 14 shows the evaluation of the retrieved AOT against AERONET data for both SEVIRI (left panel) and PROBA-V (right panel). The CISAR retrievals from SEVIRI observations shows a better agreement with the AERONET data compared to the retrievals from PROBA-V observations. This is in accordance with the poor radiometric performances of the polar orbiting instrument and with the outcome of the information content analysis performed in Sect. 4.

The boxplots in Fig. 14 show an overestimation of the retrieval for low AOT and an underestimation for large AOT. A similar behaviour is also observed in Wagner et al. (2010). The underestimation for large values might be partially due to the temporal constraints described in Sect. 2.4, as they might prevent the algorithm to fit rapidly evolving aerosol events associated with large AOT values. However the applied temporal constraints are intended to optimise the retrieval of low aerosol concentration, given the global distribution of AOT which is normally smaller than 0.2 (Kokhanovsky et al., 2007). Additionally, very high AOT normally correspond to local events, especially in Europe

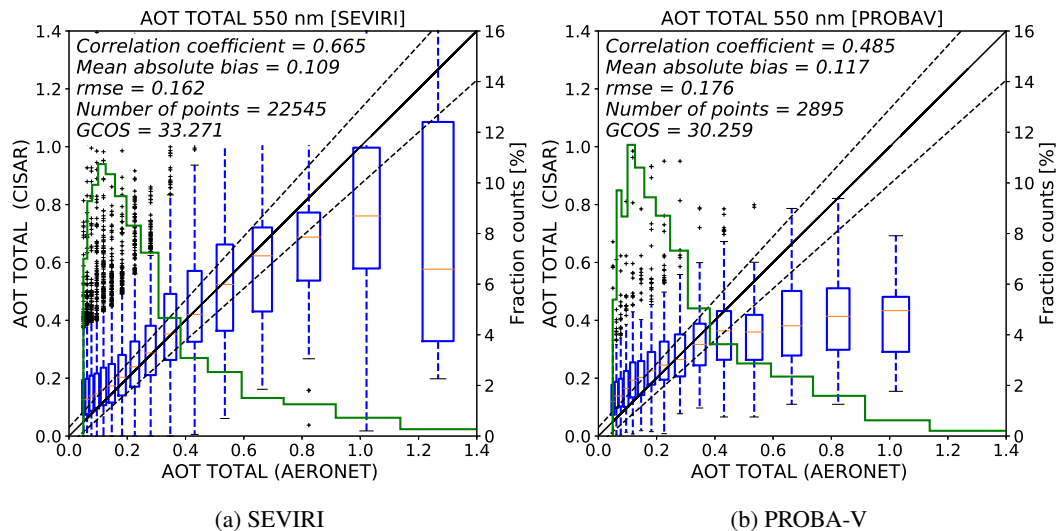

Fig. 14: Boxplots showing the CISAR AOT retrieval extrapolated at 0.55  $\mu\text{m}$  (left y-axis) against the AERONET data (x-axis) for SEVIRI (left panel) and PROBA-V (right panel) over all the selected stations. Only retrievals with  $QI \geq 0.2$  are considered. The blue boxes represent the interquartile range ( $IQR$ ), the red horizontal line represents the median value, the vertical dashed bars represent the  $1.5 \times IQR$  range and the black crosses represent the outliers. The green histograms represent the AERONET AOT distribution. The right y-axis shows the percentage of points contained in each bin. Bins with less than 10 points are not displayed.



(e.g. plume, fire), therefore the AOT obtained by the retrieval from the satellite pixel containing the AERONET station will be lower than the one measured by the AERONET tower (Jiang et al., 2007). The histograms in Fig. 14 show that AOT values larger than 0.8 represent less than 5% of the total number AERONET observations, affecting the reliability of the statistics for high values of AOT. The processing of more data would be necessary to increase the confidence in results for high AOT values. Some examples of CISAR's ability to detect high AOT are shown in the Supplement.

The overestimation of low AOT might originate from the different spatial scale between the satellite observations and the ground measurements. Most of the selected AERONET stations are located in Europe (Fig. 1), where the SEVIRI pixel resolution is about 5x8 km (as opposed to 3x3 km at the subsatellite point), which is compared to AERONET point measurement. The probability of residual cloud contamination at this scale might thus explain part of the overestimation (Henderson and Chylek (2005), Chand et al. (2012)). Furthermore, the shortest SEVIRI spectral band is centred at 0.67  $\mu\text{m}$ , where the sensitivity to low optical thickness is about 2 times smaller than in the blue spectral region. Consequently, the retrieval in these cases essentially relies on the prior information regardless the very large associated uncertainty. Despite the presence of a blue band and a better spatial resolution (1 km), the retrievals from PROBA-V observations still show overestimation at low AOT, due to the poor radiometric performances which decrease the importance of the information derived from the observations and to the lack of a thermal channel that leads to an unreliable cloud mask.

The CISAR potential to discriminate between the fine and coarse mode is analysed next. Figure 15 shows the fine and coarse mode ratio distribution related to AERONET data (in green) and CISAR

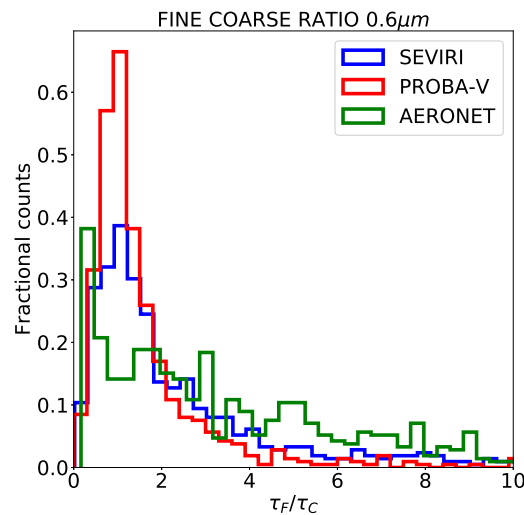

Fig. 15: Fine-coarse mode ratio distribution at 0.6  $\mu\text{m}$  from AERONET (green) and from CISAR applied to SEVIRI (blue) and PROBA-V (red) observations.

retrieval for SEVIRI (in blue) and PROBA-V (in red). It can be seen that the distribution related to CISAR retrievals from SEVIRI and PROBA-V observations seem to underestimate the fine mode concentration for  $\tau_F/\tau_C > 3$ . The percentage of cases where CISAR succeeds in retrieving a predominant fine mode contribution to the total AOT ( $\tau_F/\tau_C > 1$ ), is equal to 80% when the retrieval is performed on SEVIRI acquisition and 62% when CISAR is applied to PROBA-V data. This represents an improvement with respect to the Land Daily Aerosol (LDA) algorithm (Wagner et al. (2010), Table 4) where particles retrieved by AERONET as spherical were correctly characterised by the algorithm only in the 12% of cases. This represents a decisive advantage of the proposed approach with a continuous variations of the aerosol properties in the solution space, as opposed to the use of a limited number of aerosol classes as in Wagner et al. (2010). The coarse particle retrieval appears to be more challenging for both satellites. The percentage of cases where the coarse mode is correctly retrieved as predominant is 43% and 30% for the retrieval from SEVIRI and PROBA-V observations respectively. The less accurate retrieval of the coarse mode compared to the fine mode is expected, as the considered wavelengths are less sensitive to the radii in the range of the coarse particles than to those of fine ones (Torres et al., 2017). This can also be observed in Table 8 where the median magnitude of the coarse mode Jacobian is less than an half of the fine mode Jacobian.

### 6.3 Single scattering albedo and asymmetry factor

In Sect. 3.2 the solution space defined by the aerosol classes vertices has been described. CISAR retrieves the averaged SSA and asymmetry factor within this solution space as linear combinations of the single scattering properties of each selected aerosol vertex (Eq. 8 and 9 of Part I). Figures 16

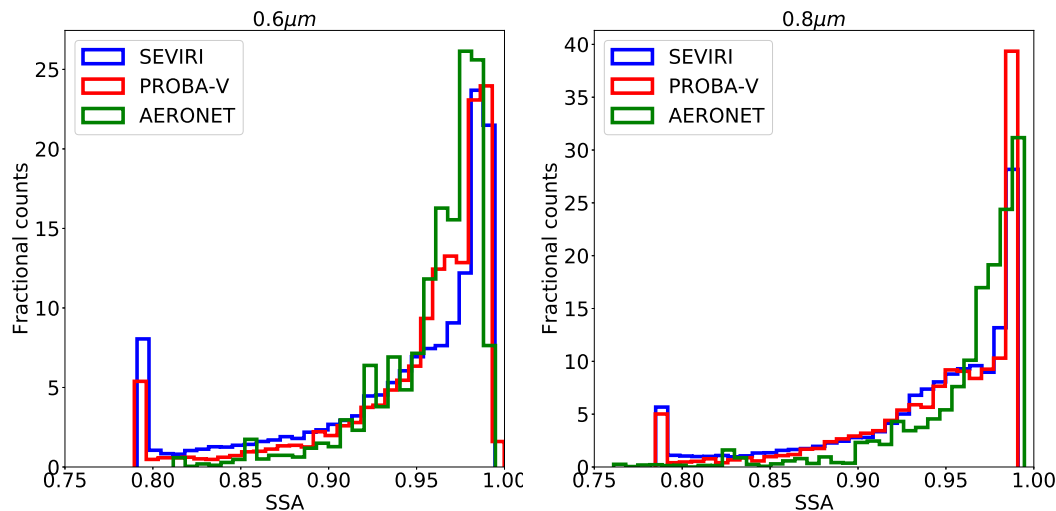

Fig. 16: SSA distributions at 0.6  $\mu\text{m}$  (left panel) and 0.8  $\mu\text{m}$  (right panel) for AERONET (green), CISAR applied to SEVIRI (blue) and to PROBA-V (red).

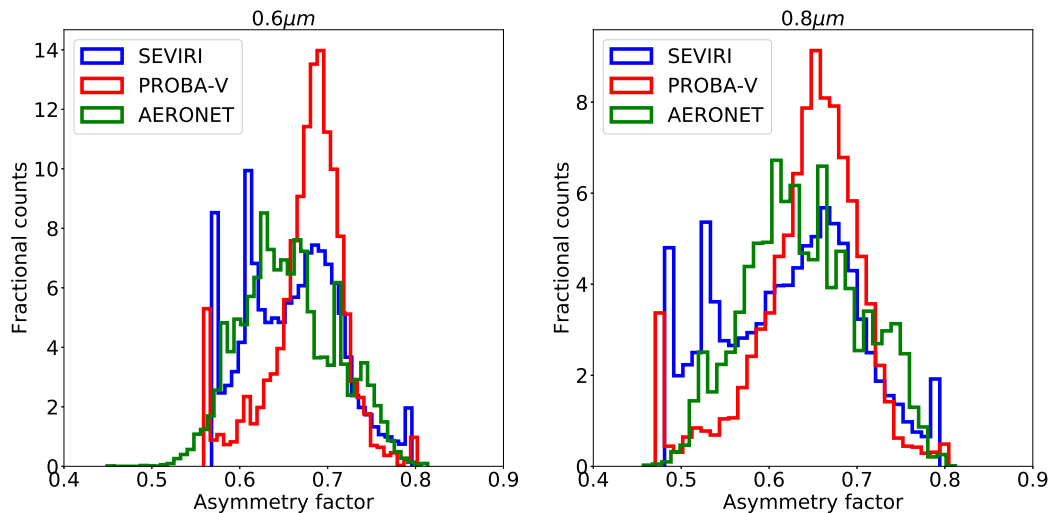

Fig. 17: Same as Figure 16 but for the asymmetry factor.

and 17 show the SSA and asymmetry factor distributions related to the AERONET inversion product and CISAR retrievals. All the AERONET inversions are considered, without applying the quality test as in Holben et al. (2006). The three datasets show similar distributions, although spikes can be observed at the extremes of the CISAR retrievals distributions. When the AERONET solution is located outside the solution space, CISAR cannot converge to it and the retrievals falls on the solution space boundaries, causing the spikes. The aerosol vertices selection as in Fig. 4 is conceived to limit the number of occurrences of these spikes. Figure 17 shows that the  $g$  parameter distributions obtained from PROBA-V observations is much narrower than the same distribution related to AERONET and CISAR applied to SEVIRI observations. This is in line with what has been discussed in Sect. 6.2 on the poorer CISAR performances in retrieving the predominant mode when applied to PROBA-V observations rather than SEVIRI ones. In fact, as in computing  $g$  the aerosol size distribution is the most important parameter to measure (Andrews et al., 2006), an inexact estimate of the dominant mode (fine or coarse) leads to an erroneous measurement of the asymmetry parameter.

## 7 Discussion and conclusion

This paper describes and evaluates the application of the CISAR algorithm to satellite observations acquired from geostationary and polar orbiting instruments. The theoretical aspects of CISAR, a new generic algorithm for the joint retrieval of surface reflectance and aerosol properties, with continuous variation of all the state variables in the solution space, are described in Part I. In the latter CISAR is applied to simulated noise free observations in the principal plane. This paper provides an

evaluation of the algorithm in non ideal situations, *i.e.*, actual satellite observations acquired from both geostationary and polar orbiting satellites, namely SEVIRI and PROBA-V.

485 The proposed retrieval method relies on an OE approach which consists of the inversion of FASTRE, a simple radiative transfer model composed of two horizontal layers. The FASTRE model is evaluated in Sect. 2.5 showing an accuracy within 3% when compared to a complex 1D radiative transfer model. Higher uncertainties are observed in spectral bands affected by water vapour as a result of the limited vertical discretisation.

490 The analysis of the information content of the satellite observations is performed in Sect. 4. Though the PROBA-V instrument has one blue channel which is not present in SEVIRI, the better radiometric performances of the geostationary satellite provide more information for the retrieval of surface reflectance and aerosol properties than the polar orbiting instrument.

The CISAR retrieval is evaluated against independent datasets. The retrieved AOT is compared to  
495 AERONET data. A specific QI has been developed to disregard suspicious retrievals. With a RMSE of 0.162 for SEVIRI and 0.176 for PROBA-V, CISAR shows better performances when applied to the geostationary satellite. CISAR retrieves the single scattering aerosol properties assuming a linear behaviour of  $g$  and  $\omega_0$  in the solution space; although this assumption is not exactly true when far from pure single mode situations, CISAR retrieved aerosol properties distributions are in  
500 good agreement with the AERONET inversion products, especially when the algorithm is applied to geostationary observations, as discussed in Sect. 6.3. These differences are explained by the different information content associated to the observations acquired by the two satellites. For both satellites, CISAR discrimination between fine and coarse mode is improved with respect to the LDA algorithm (Wagner et al., 2010), as the continuous variation of the aerosol properties in the solution  
505 space allows more accurate retrievals of the single scattering properties with respect to LUT-based approaches. The CISAR surface albedo is compared with the MODIS product, showing a correlation higher than 0.74 in all processed bands (to the exception of the NIR PROBA-V band). The better performances of CISAR in retrieving the surface reflectance rather than the AOT are explained by the larger contribution to the TOA BRF at the satellite of the surface. The little variance of the  
510 surface reflectance on a short time scale allows a good prior definition based on the previous CISAR retrievals.

Several aspects of the new CISAR algorithm would still require additional efforts to improve its performance. Cloud mask omission errors impact on the AOT overestimation at low optical thickness would also deserve additional work. The analysis of the Jacobian median values has revealed the  
515 very small magnitude of the fine and coarse mode AOT Jacobians. Spectral and temporal constraints of the AOT variability play therefore a critical role in supporting the assessment of aerosol properties. However, these constraints might lead to an underestimation of the AOT for large values.

As pointed out in Part I, the limited number of state variables retrieved by CISAR allows the same algorithm to be applied to sensors which have not been originally designed for aerosol or surface

520 albedo retrieval. The possibility to apply the same algorithm to data acquired by different sensors  
for the retrieval of several ECVs presents a decisive advantage. It provides radiatively consistent  
ECVs derived from different sensors. Conversely, the use of separate methods for the retrieval of  
different variables might lead to a radiance bias, which has to be corrected preliminary to the assim-  
ilation of these variables (Thépaut, 2003). The effort for the assimilation of surface and atmospheric  
525 products could be reduced if the different ECVs are consistently derived with one single algorithm.  
The consistent retrieval of the state variables and the algorithm applicability to different sensors  
represent an important advantage for the Numerical Weather Prediction (NWP) community, whose  
main future challenges are related to a more consistent retrieval of Earth's system components and  
to the availability of more satellite data.

## 530 **8 Supplement**

Included are the scatterplots of the BHR retrieved by CISAR versus the BHR delivered by MODIS  
(Fig. S1, S2), and a few examples of the CISAR high-AOT retrievals compared with AERONET  
data.

## **9 Acknowledgements**

535 *Acknowledgements.* This work has been performed in the framework of ESA projects aerosol\_cci2 and PV-  
LAC under the contract 4000109874/14/I-NB and 4000114981/15/I-LG respectively. The authors would like  
to thank the reviewers for their fruitful suggestions.

## References

- Andrews, E., Sheridan, P. J., Fiebig, M., McComiskey, A., Ogren, J. A., Arnott, P., Covert, D., Elleman,  
540 R., Gasparini, R., Collins, D., Jonsson, H., Schmid, B., and Wang, J.: Comparison of methods for deriving aerosol asymmetry parameter, *Journal of Geophysical Research*, 111, doi:doi:10.1029/2004JD005734, 2006.
- Chand, D., Wood, R., Ghan, S. J., Wang, M., Ovchinnikov, M., Rasch, J. P., Miller, S., Schichtel, B., and Moore, T.: Aerosol optical depth increase in partly cloudy conditions, *Journal of Geophysical Research*, 117, 2012.
- DAAC, O.: MODIS Collection 5 Land Products Global Subsetting and Visualization Tool., 2017.
- 545 DAAC, O.: Terra and Aqua Moderate Resolution Imaging Spectroradiometer, <https://ladsweb.modaps.eosdis.nasa.gov/missions-and-measurements/modis/>, online, accessed 19 June 2018, 2018.
- Dee, D. P., Uppala, S. M., Simmons, A. J., Berrisford, P., Poli, P., Kobayashi, S., Andrae, U., Balmaseda, M. A., Balsamo, G., Bauer, P., Bechtold, P., Beljaars, A. C. M., van de Berg, L., Bidlot, J., Bormann, N., Delsol, C., Dragani, R., Fuentes, M., Geer, A. J., Haimberger, L., Healy, S. B., Hersbach, H., Hólm, E. V., Isaksen, I.,  
550 Kållberg, P., Köhler, M., Matricardi, M., McNally, A. P., Monge-Sanz, B. M., Morcrette, J., Park, B., Peubey, C., de Rosnay, P., Tavolato, C., Thépaut, J., and Vitart, F.: The ERA-Interim reanalysis: configuration and performance of the data assimilation system, *Quarterly Journal of the Royal Meteorological Society*, 137, 553–597, doi:10.1002/qj.828, <https://rmets.onlinelibrary.wiley.com/doi/abs/10.1002/qj.828>, 2011.
- Dubovik, O., Sinyuk, A., Lapyonok, T., Holben, B. N., Mishchenko, M., Yang, P., Eck, T. F., Volten, H., Munoz,  
555 O., Veihelmann, B., van der Zande, W. J., Leon, J. F., Sorokin, M., and Slutsker, I.: Application of spheroid models to account for aerosol particle nonsphericity in remote sensing of desert dust, *Journal of Geophysical Research-Atmospheres*, 111, 11 208–11 208, 2006.
- Dubovik, O., Herman, M., Holdak, A., Lapyonok, T., Tanré, D., Deuzé, J. L., Ducos, F., Sinyuk, A., and Lopatin, A.: Statistically optimized inversion algorithm for enhanced retrieval of aerosol properties from  
560 spectral multi-angle polarimetric satellite observations, *Atmospheric Measurement Techniques*, 4, 975–1018, 2011.
- Giles, D. N., Holben, B. N., Eck, T. F., Smirnov, A., Sinyuk, A., Schafer, J., Sorokin, M. G., and Slutsker, I.: Aerosol Robotic Network (AERONET) Version 3 Aerosol Optical Depth and Inversion Products, American Geophysical Union, Fall Meeting 2017, abstract #A110-01, 2017.
- 565 Govaerts, Y. and Lattanzio, A.: Retrieval Error Estimation of Surface Albedo Derived from Geostationary Large Band Satellite Observations: Application to Meteosat-2 and -7 Data, *Journal of Geophysical Research*, 112, doi:10.1029/2006JD007313, 2007.
- Govaerts, Y. and Luffarelli, M.: Joint Retrieval of Surface Reflectance and Aerosol Properties with Continuous Variations of the State Variables in the Solution Space: Part I: Theoretical Concept, *Atmos. Meas. Tech.*  
570 *Discuss*, pp. 1–27, doi:doi:10.5194/amt-2017-29, 2017.
- Govaerts, Y., Wagner, S., Lattanzio, A., and Watts, P.: Optimal estimation applied to the joint retrieval of aerosol optical depth and surface BRDF using MSG/SEVIRI observations, chap. 11, Springer, 2008.
- Govaerts, Y., Sterckx, S., and Adriaensen, S.: Use of simulated reflectances over bright desert target as an absolute calibration reference, *Remote Sensing Letters*, 4, 523–531, 2013.
- 575 Govaerts, Y., Luffarelli, M., and E., P.: CISAR-ATBD-V2.0, [https://earth.esa.int/documents/700255/2632405/PV-LAC\\_ATMO\\_ATBD\\_IODD\\_V2.pdf/4408fa65-e644-4b2f-a8a7-e97b7e6f0de2](https://earth.esa.int/documents/700255/2632405/PV-LAC_ATMO_ATBD_IODD_V2.pdf/4408fa65-e644-4b2f-a8a7-e97b7e6f0de2), 2017.
- Govaerts, Y. M., Wagner, S., Lattanzio, A., and Watts, P.: Joint retrieval of surface reflectance and aerosol

- optical depth from MSG/SEVIRI observations with an optimal estimation approach: 1. Theory, *Journal of Geophysical Research*, 115, doi:10.1029/2009JD011779, 2010.
- 580 Henderson, B. and Chylek, P.: The effect of spatial resolution on satellite aerosol optical depth retrieval, *IEEE Transactions on Geoscience and Remote Sensing*, 43, 1984 – 1990, doi:10.1109/TGRS.2005.852078, <https://ieeexplore.ieee.org/document/1499014>, 2005.
- Holben, B. N., Eck, T. F., Slutsker, I., Smirnov, A., Sinyuk, A., Schafer, J., Giles, D., and Dubovik, O.: Aeronet's Version 2.0 quality assurance criteria, *Proc.SPIE*, 6408, 6408 – 6408 – 14, doi:10.1117/12.706524, 585 <https://doi.org/10.1117/12.706524>, 2006.
- Hsu, N. C., Jeong, M., Bettenhausen, C., Sayer, A., Hansell, R., Seftor, C., Huang, J., and Tsay, S.: Enhanced Deep Blue Aerosol Retrieval Algorithm: The Second Generation, *Journal of Geophysical Research: Atmospheres*, 118, 9296–9315, 2013.
- Hubanks, P.: MODIS Atmosphere QA Plan for Collection 061, [https://modis-atmos.gsfc.nasa.gov/sites/default/files/ModAtmo/QA\\_Plan\\_C61\\_Master\\_2017\\_03\\_15.pdf](https://modis-atmos.gsfc.nasa.gov/sites/default/files/ModAtmo/QA_Plan_C61_Master_2017_03_15.pdf), 2017.
- 590 Jiang, X., Liu, Y., Yu, B., and Jiang, M.: Comparison of MISR aerosol optical thickness with AERONET measurements in Beijing metropolitan area, *Remote Sensing of Environment*, 107, 45 – 53, doi:<https://doi.org/10.1016/j.rse.2006.06.022>, <http://www.sciencedirect.com/science/article/pii/S0034425706004329>, multi-angle Imaging SpectroRadiometer (MISR) Special Issue, 2007.
- 595 Kaufman, Y. J., Tanré, D., Gordon, H. R., Nakajima, T., Lonoble, J., Frouin, R., Grassl, H., Herman, M., King, M. D., and Teillet, P. M.: Passive remote sensing of tropospheric aerosol and atmospheric correction for the aerosol effect, *Journal of Geophysical Research: Atmospheres*, 102, 16 815–16 830, 1997.
- Kinne, S., O'Donnel, D., Stier, P., Kloster, S., Zhang, K., Schmidt, H., Rast, S., Giorgetta, M., Eck, T. F., and Stevens, B.: MAC-v1: A New Global Aerosol Climatology for Climate Studies, *Journal of Advances in* 600 *Modeling Earth Systems*, 5, doi:10.1002/jame.20035, 2013.
- Kokhanovsky, A. A., Breon, F. M., Cacciari, A., Carboni, E., Diner, D., Di Nicolantonio, W., Grainger, R. G., Grey, W. M. F., Höller, R., Lee, K. H., Li, Z., North, P. R. J., Sayer, A. M., Thomas, G. E., and von Hoyningen-Huene, W.: Aerosol remote sensing over land: A comparison of satellite retrievals using different algorithms and instruments, *Atmospheric Research*, 85, 372–394, doi:doi:10.1016/j.atmosres.2007.02.008, 605 2007.
- Luffarelli, M., Govaerts, Y., and Damman, A.: Assessing hourly aerosol properties retrieval from MSG/SEVIRI observations in the framework of aerosol-cci2, in: *Living Planet Symposium 2016*, Prague, Czech Republic, Prague, Czech Republic, 2016.
- Marquardt, D.: An Algorithm for Least-Squares Estimation of Nonlinear Parameters, *SIAM Journal on Applied* 610 *Mathematics*, 11, 431–441, 1963.
- Mei, L., Rozanov, V., Vountas, M., Burrows, J., and Jafariserajehlou, S.: XBAER: A versatile algorithm for the retrieval of aerosol optical thickness from satellite observations, *Geophysical Research Abstracts*, 19, 2017.
- Meteo France: Algorithm Theoretical Basis Document for “Cloud Products” (CMa-PGE01 v3.2, CT-PGE02 v2.2 & CTTH-PGE03 v2.2), Tech. Rep. CTTH-PGE03 v2.2, 2013.
- 615 Pinty, B., Roveda, F., Verstraete, M. M., Gobron, N., Govaerts, Y., Martonchik, J. V., Diner, D. J., and Kahn, R. A.: Surface albedo retrieval from Meteosat: Part 1: Theory, *Journal of Geophysical Research*, 105, 18 099–18 112, 2000.

- Rahman, H., Pinty, B., and Verstraete, M. M.: Coupled surface-atmosphere reflectance (CSAR) model. 2. Semiempirical surface model usable with NOAA Advanced Very High Resolution Radiometer Data, *Journal of Geophysical Research*, 98, 20,791–20,801, 1993.
- 620
- Rodgers, C. D.: *Inverse methods for atmospheric sounding, Series on Atmospheric Oceanic and Planetary Physics*, World Scientific, 2000.
- Schaaf, C. and Wang, Z.: MCD43A1 MODIS/Terra+Aqua BRDF/Albedo Model Parameters Daily L3 Global - 500m V006, doi:<https://doi.org/10.5067/MODIS/MCD43A1.006>, 2015.
- 625
- Seidel, F. C., Kokhanovsky, A. A., and Schaepman, M. E.: Fast and simple model for atmospheric radiative transfer, *Atmospheric Measurement Techniques*, 3, 1129–1141, doi:10.5194/amt-3-1129-2010, <https://www.atmos-meas-tech.net/3/1129/2010/>, 2010.
- Sissenwine, N., Dubin, M., and S., T.: *US Standard Atmosphere*, 1976.
- Sterckx, S., Livens, S., and Adriaensen, S.: Rayleigh, Deep Convective Clouds, and Cross-Sensor Desert Vicarious Calibration Validation for the PROBA-V Mission, *IEEE Transactions on Geoscience and Remote Sensing*, 51, 2013.
- 630
- Sterckx, S., Benhadj, I., Duhououx, G., Livens, S., Dierckx, W., Goor, E., and Adriaensen, S.: The PROBA-V Mission: Image Processing and Calibration, *International Journal of Remote Sensing*, 35, 2565–88, doi: <https://doi.org/10.1080/01431161.2014.883094>, 2014.
- 635
- Sun, L., Bilal, M., Tian, X., Jia, C., Guo, Y., and Mi, X.: Aerosol Optical Depth Retrieval over Bright Areas Using Landsat 8 OLI Images, *Tech. rep.*, doi:10.3390/rs8010023, <http://www.mdpi.com/journal/remotesensing>, 2016.
- Thépaut, J.: Satellite Data Assimilation in Numerical Weather Prediction: an Overview, *Data Assimilation for the Earth System*, 26, doi:[https://doi.org/10.1007/978-94-010-0029-1\\_19](https://doi.org/10.1007/978-94-010-0029-1_19), 2003.
- 640
- Torres, B., Dubovik, O., Fuertes, D., Schuster, G., Cachorro, V. E., Lapyonol, T., Goloub, P., Blarel, L., Barreto, A., Mallet, M., Toledano, C., and Tanré, D.: Advanced characterisation of aerosol size properties from measurements of spectral optical depth using the GRASP algorithm, *Atmospheric Measurement Techniques*, 10, 3743–3781, 2017.
- Wagner, S. C., Govaerts, Y. M., and Lattanzio, A.: Joint retrieval of surface reflectance and aerosol optical depth from MSG/SEVIRI observations with an optimal estimation approach: 2. Implementation and evaluation, *Journal of Geophysical Research*, 115, doi:10.1029/2009JD011780, 2010.
- 645
- Wang, Y.: Regularization for inverse models in remote sensing, *Progress in Physical Geography: Earth and Environment*, 36, 38–59, doi:10.1177/0309133311420320, <https://doi.org/10.1177/0309133311420320>, 2012.
- Weatherspark.com: Weatherspark.com, 2018, <https://weatherspark.com/y/148098/Average-Weather-at-Zinder-Airport-Niger-Year-Round>, online, accessed 30 May 2018, 2018.
- 650
- Wolters, E., Dierckx, W., Iordache, M.-D., and Swinnen, E.: *PROBA-V Products User Manual v3.01*, 2018.
